# Supplementary material
Source: bioRxiv or medRxiv preprint supplement (https://medrxiv.org/highwire/filestream/94990/field_highwire_adjunct_files/0/2020.08.27.20183574-1.pdf)
Supplement: Supplementary file [file 2020.08.27.20183574-1.pdf]

Supplementary Information for  
Data-driven Optimized control of the Covid19 Epidemics

Afroza Shirin, Yen Ting Lin, Francesco Sorrentino

August 28, 2020

## Supplementary Note 1: Model Scheme

The compartmental model described by Eq. 2 in the main text can be visualized in Figure 1 below.

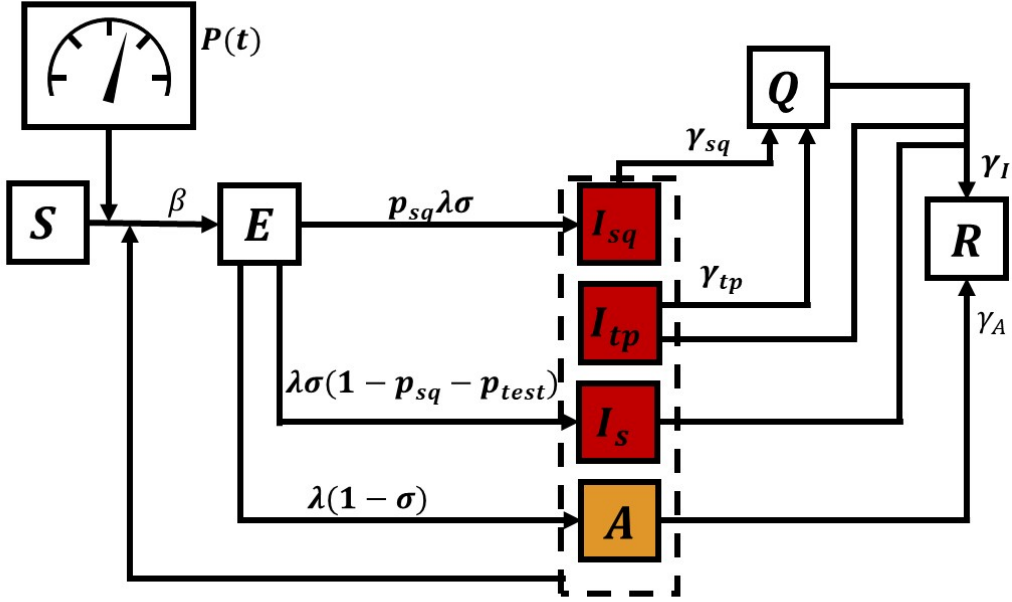

Figure 1: Compartmental model

## Supplementary Note 2: Robustness of the optimal control with respect to variations of the parameters $c_q$ and $I_{\max}$

We now investigate the effect of varying the parameters  $c_q$  and  $I_{\max}$  on the optimal control solutions. Our main result is that we find the optimal control solutions to be robust to variations in both  $c_q$  and  $I_{\max}$ . We choose two values of  $I_{\max}$ , a value corresponding to the lower value shown in Table 3 of the main manuscript ( $\rho = 2/3$ ) and a value corresponding to the larger value shown in Table 3 of the main manuscript ( $\rho = 1$ ). In Figs. 2 and 3, the states and the optimal controls are plotted for the NYC scenario, for  $I_{\max} = 0.0088$  and  $0.0132$ , respectively. In Figs. 4 and 5, the states and the optimal controls are plotted for the LA scenario, for  $I_{\max} = 0.0066$  and  $0.0097$ , respectively. In Figs. 6 and 7, the states and the optimal controls are plotted for the Houston scenario, for  $I_{\max} =$

0.0088 and 0.0129, respectively. In Figs. 8 and 9, the states and the optimal controls are plotted for the Houston scenario, for  $I_{\max} = 0.0046$  and  $0.0069$ , respectively.

All our results in Figs. 2, 3, 4, 5, 6, 7, 8 and 9 show that the optimal control solutions are robust to variations in  $c_q$ .

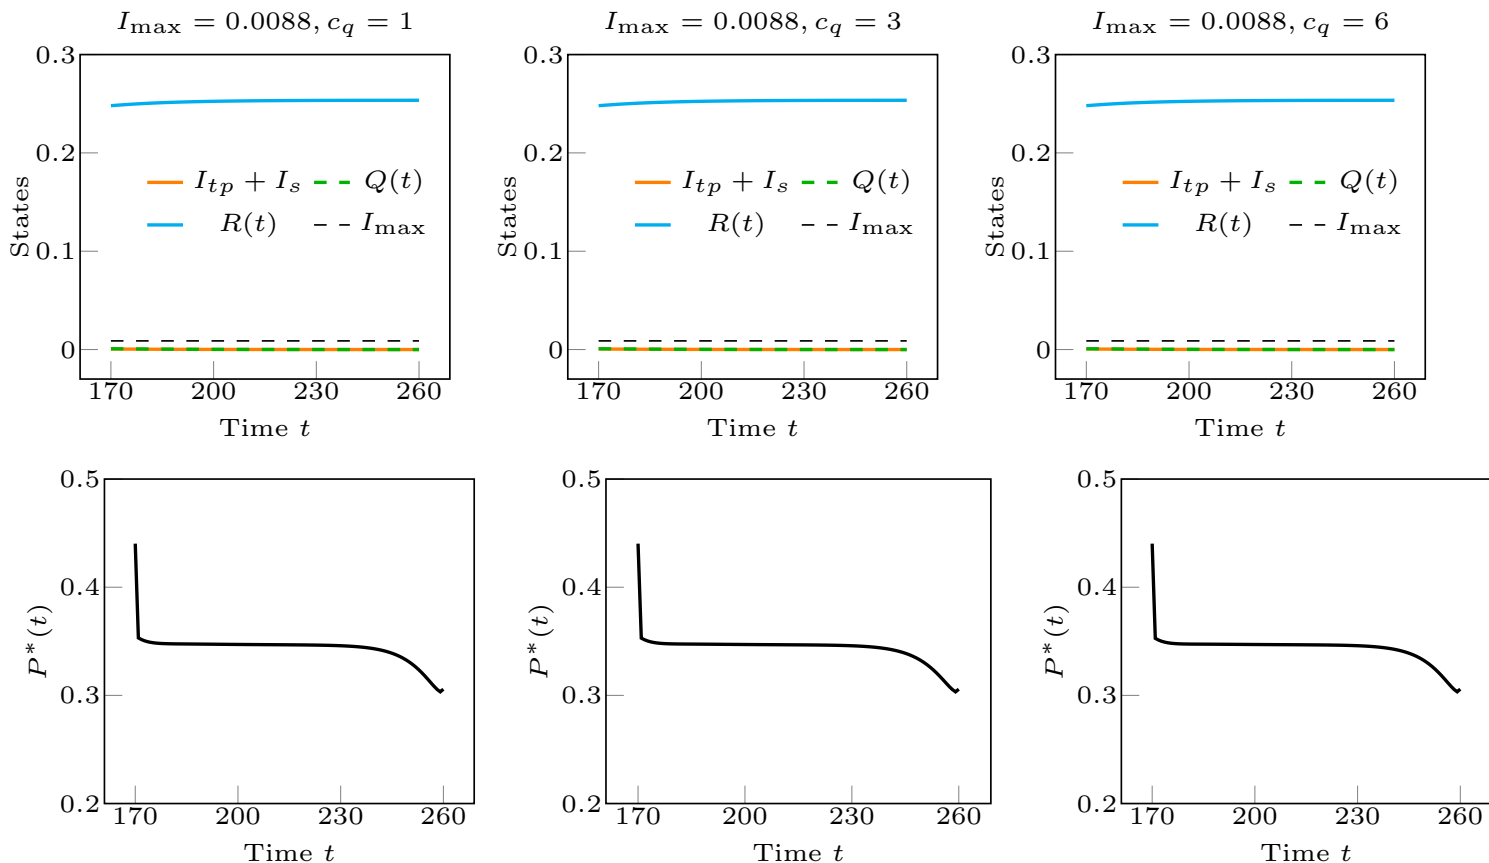

Figure 2: NYC Scenario.  $I_{\max} = 0.0088$ , minimum of the range.

Figure (10) is analogous to Figure 3 shown in the main manuscript but for the case that  $I_{\max}$  are chosen as the maximum values in Table 3 ( $\rho = 1$ .) As can be seen the solutions are the same as in Figure 3 of the main manuscript.

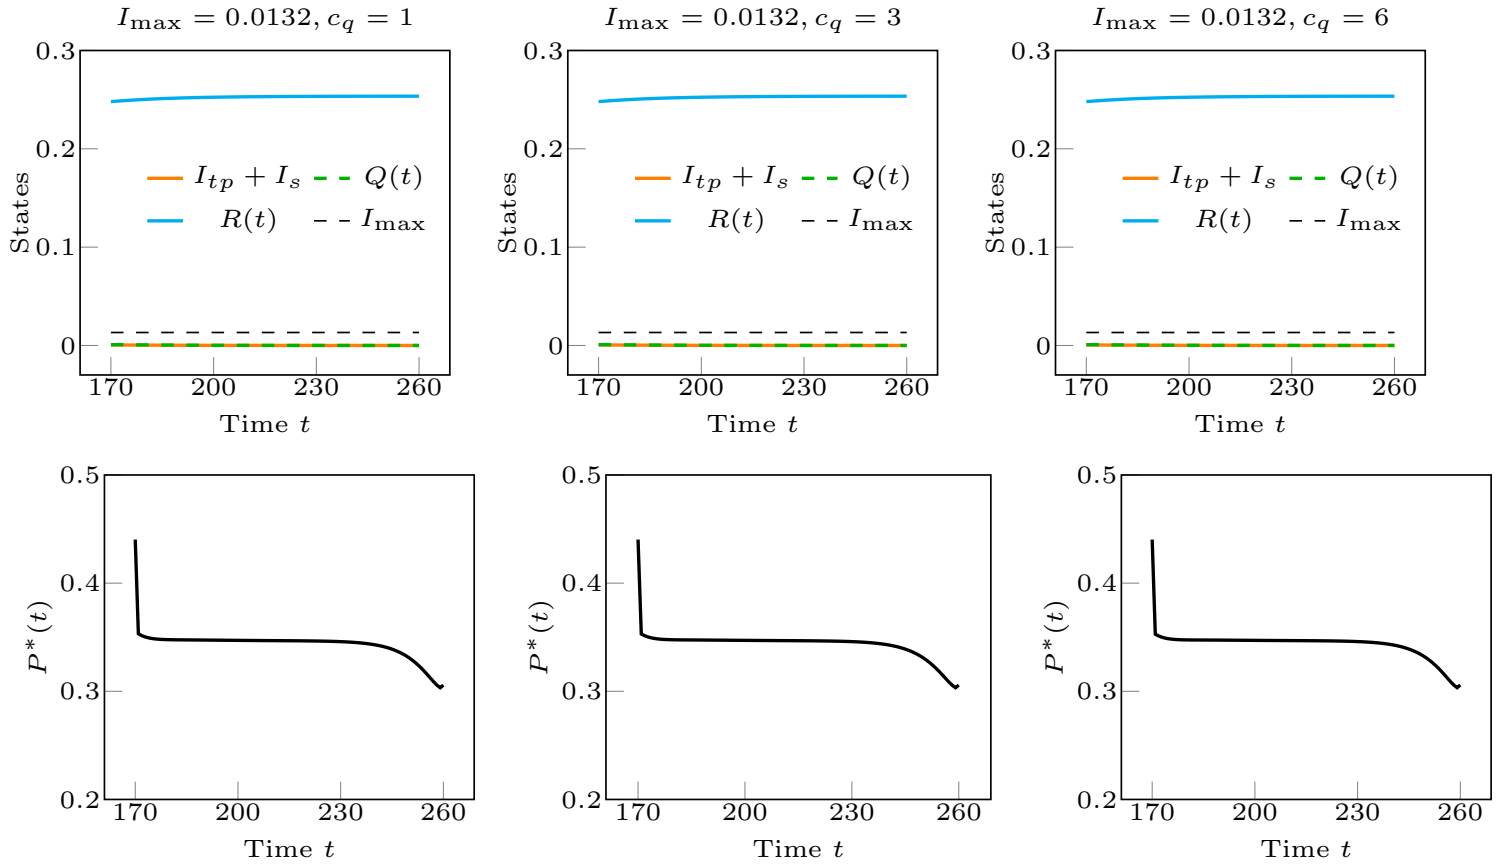

Figure 3: NYC Scenario.  $I_{\max} = 0.0132$ , maximum of the range.

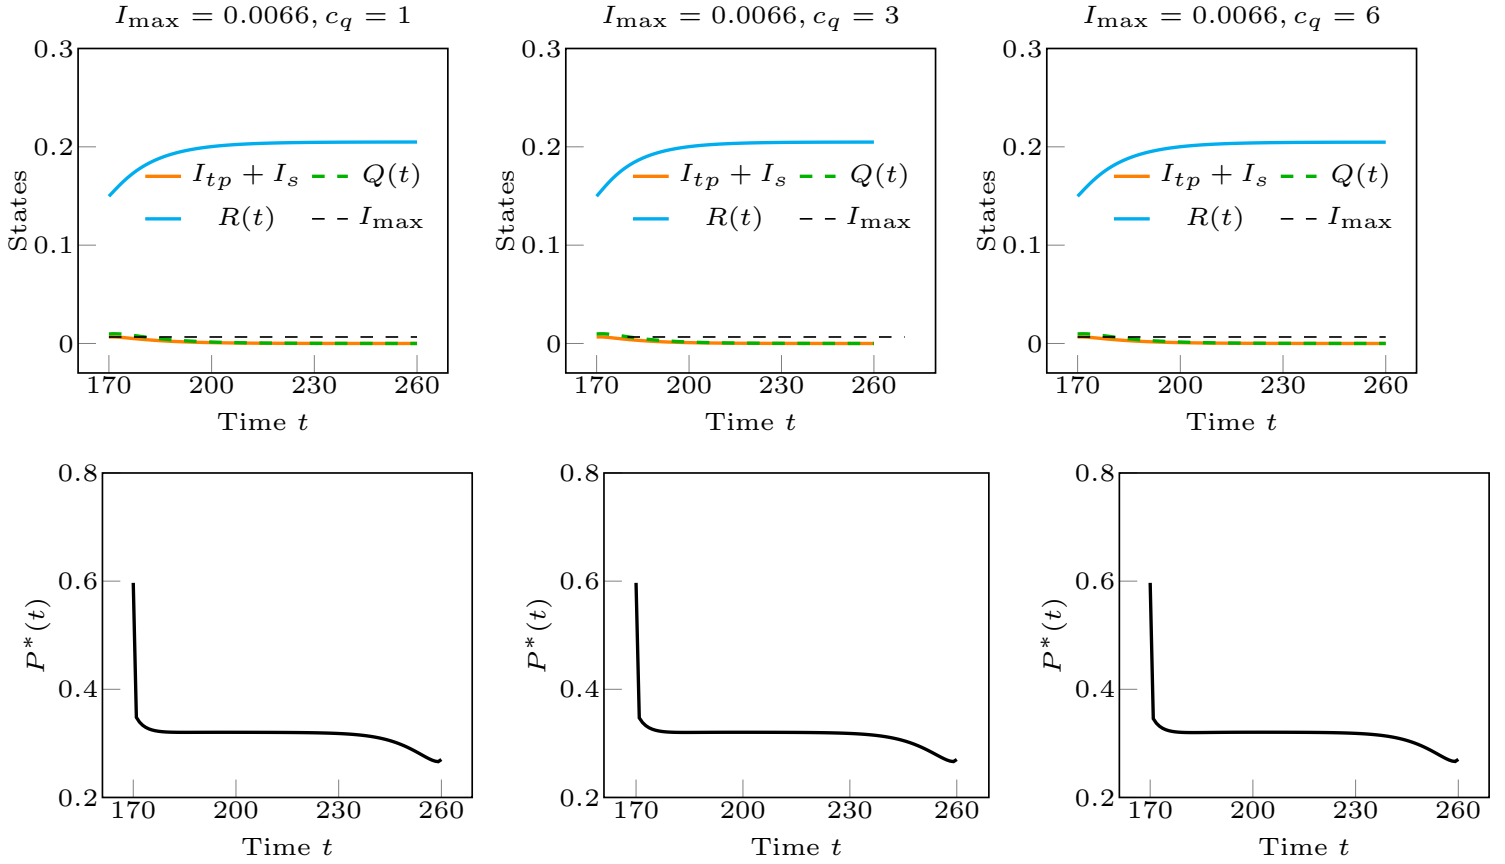

Figure 4: LA Scenario.  $I_{\max} = 0.0066$ , minimum of the range.

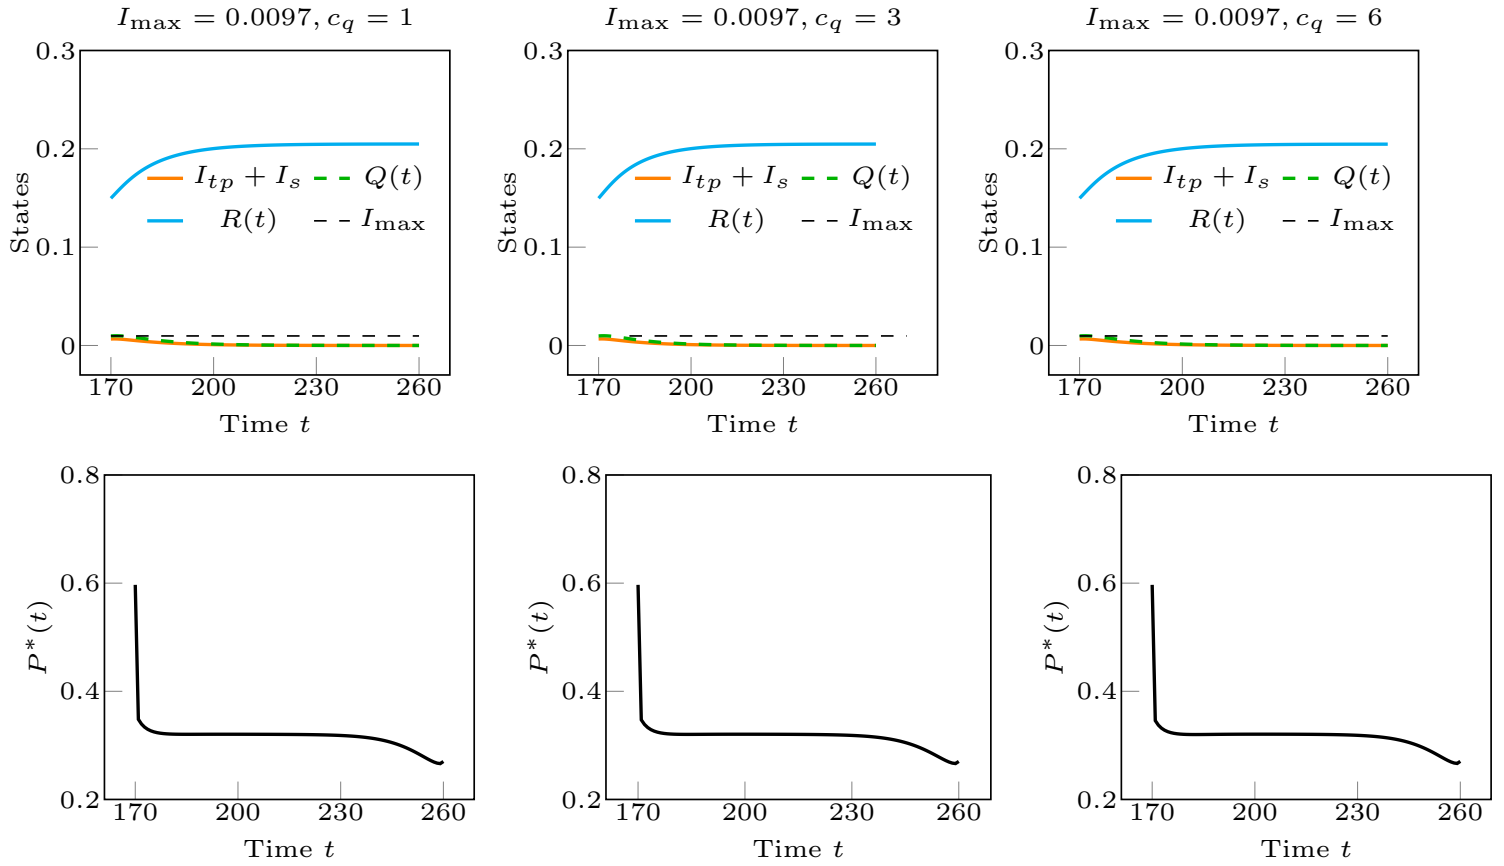

Figure 5: LA Scenario.  $I_{\max} = 0.0097$ , maximum of the range.

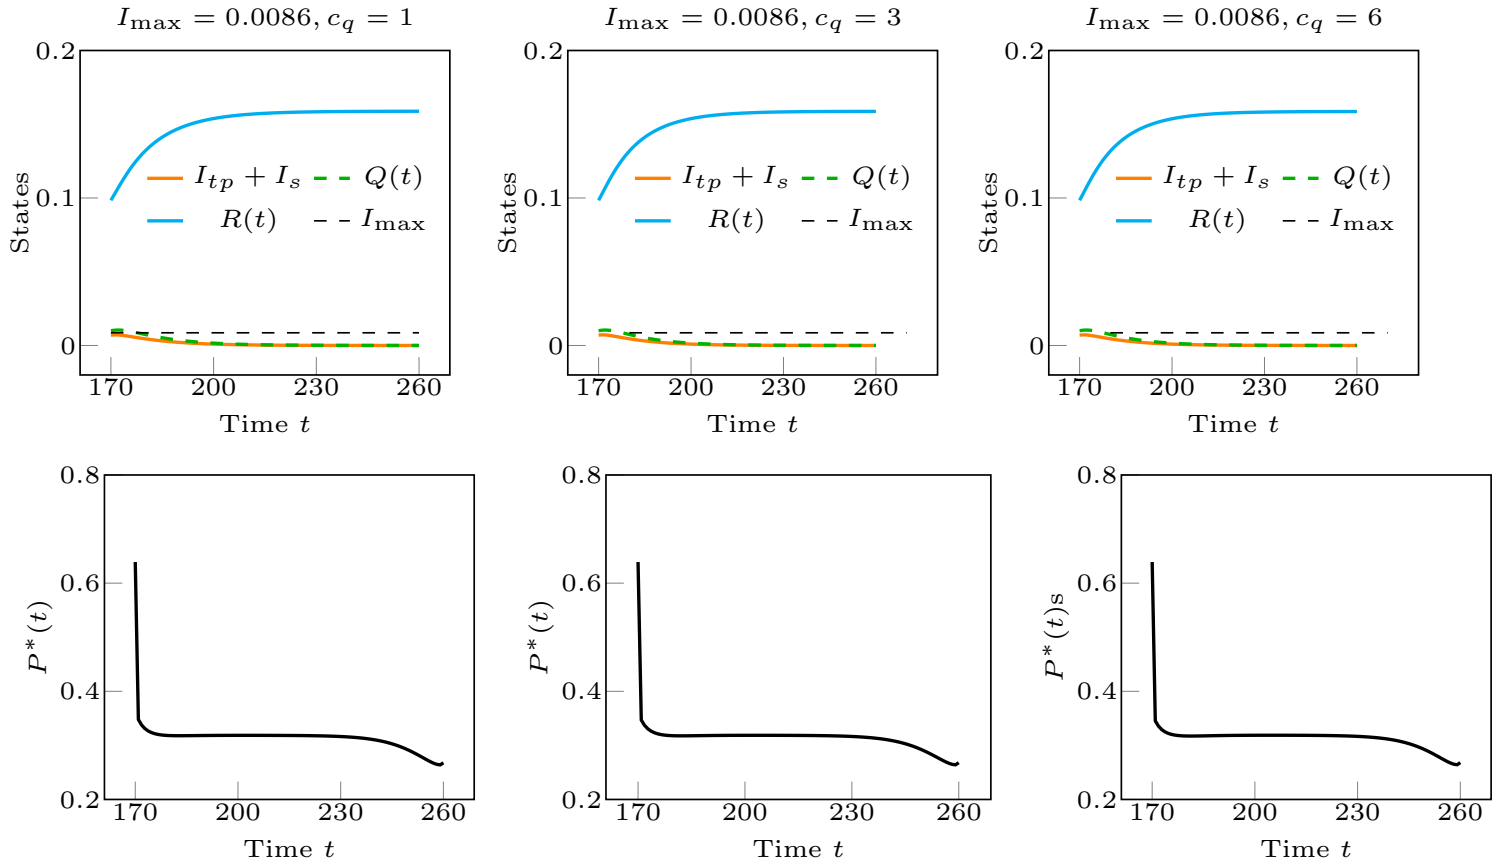

Figure 6: Houston Scenario.  $I_{\max} = 0.0086$ , minimum of the range.

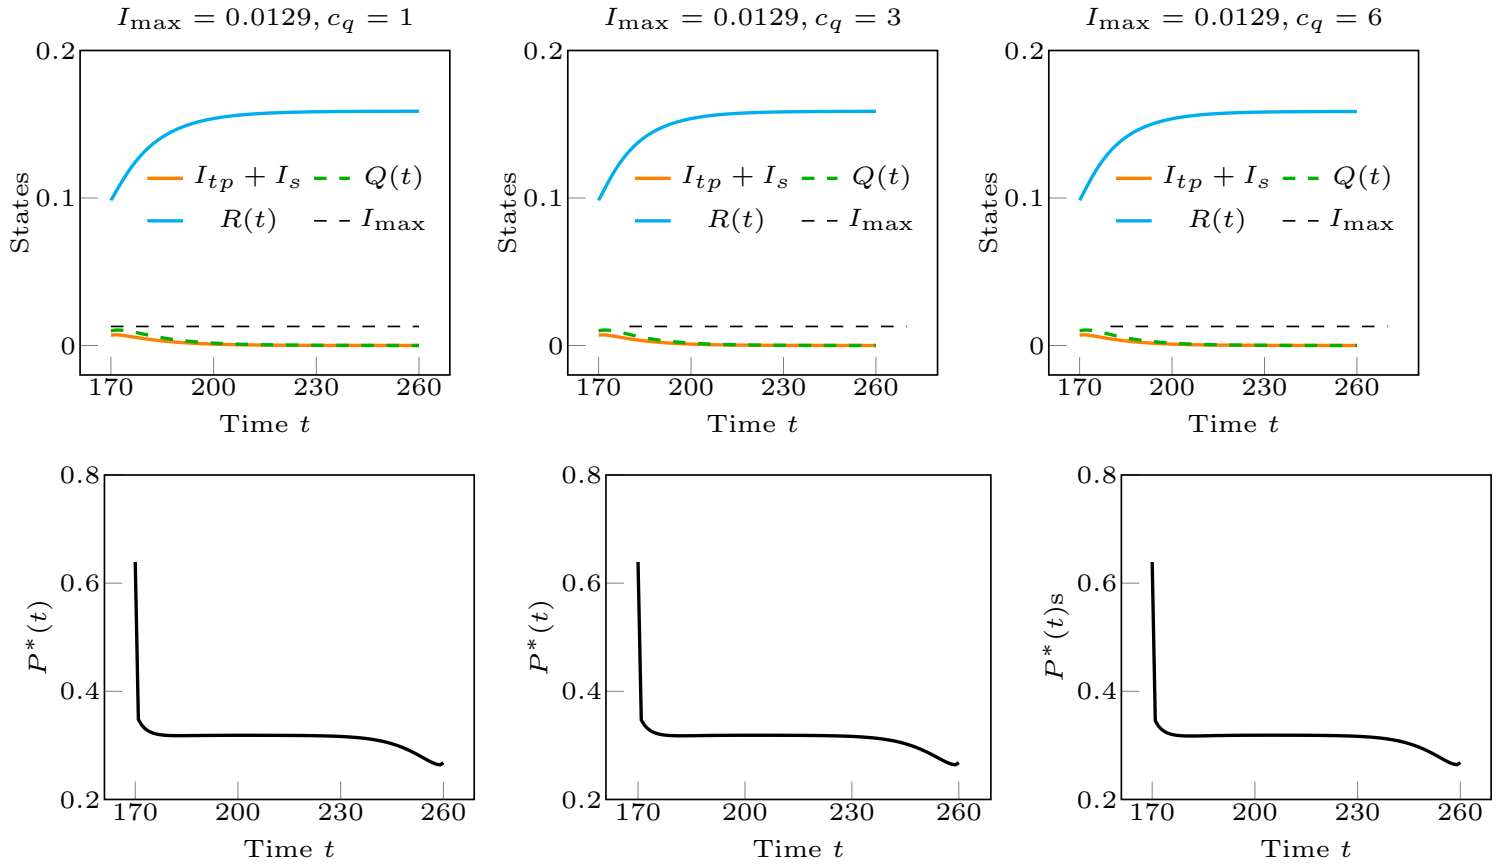

Figure 7: Houston Scenario.  $I_{\max} = 0.0129$ , maximum of the range.



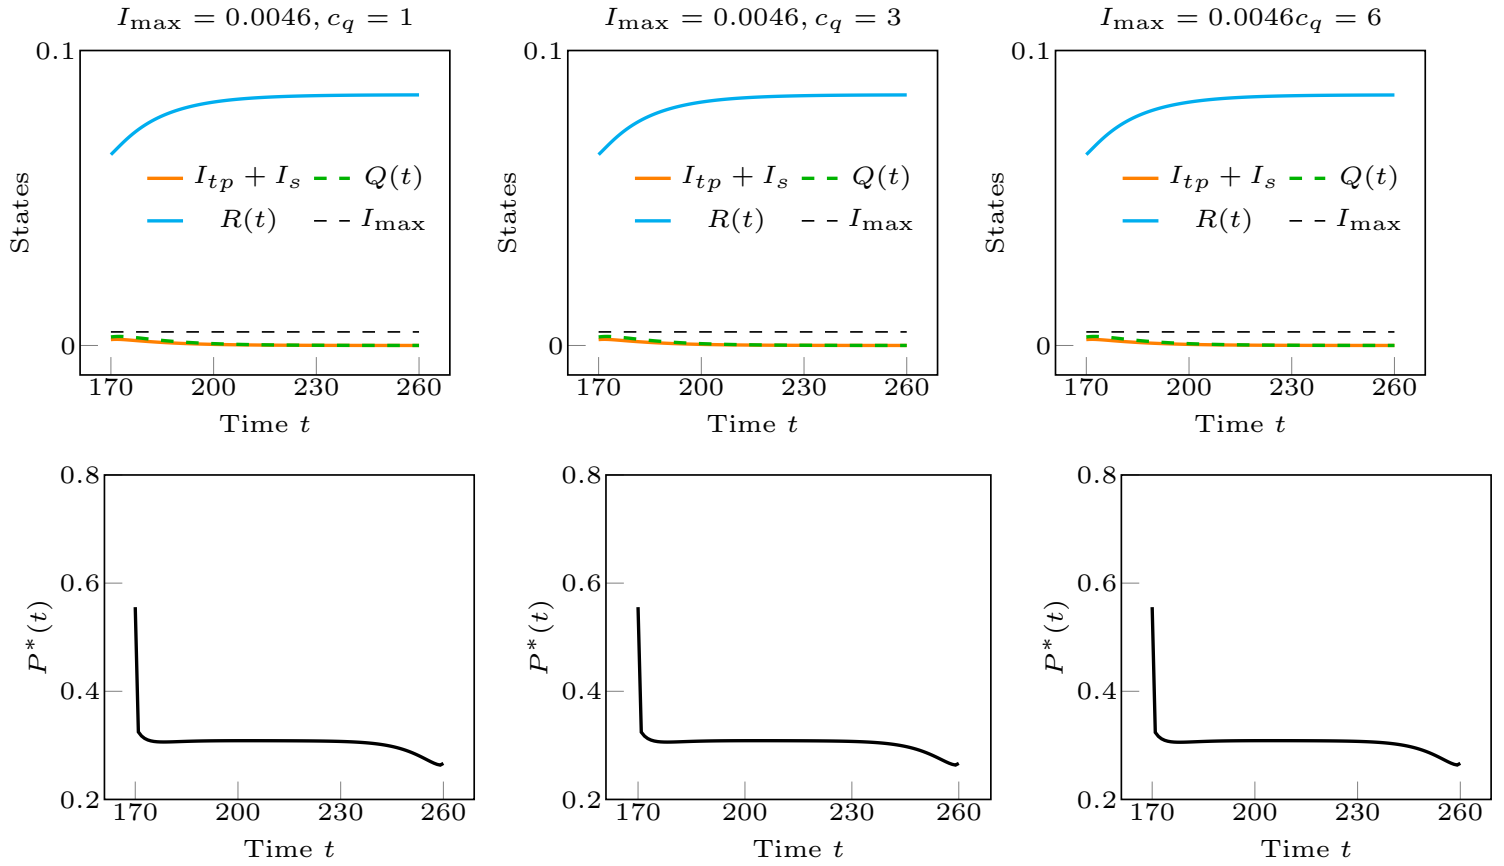

Figure 8: Seattle Scenario.  $I_{\max} = 0.0046$ , minimum of the range.

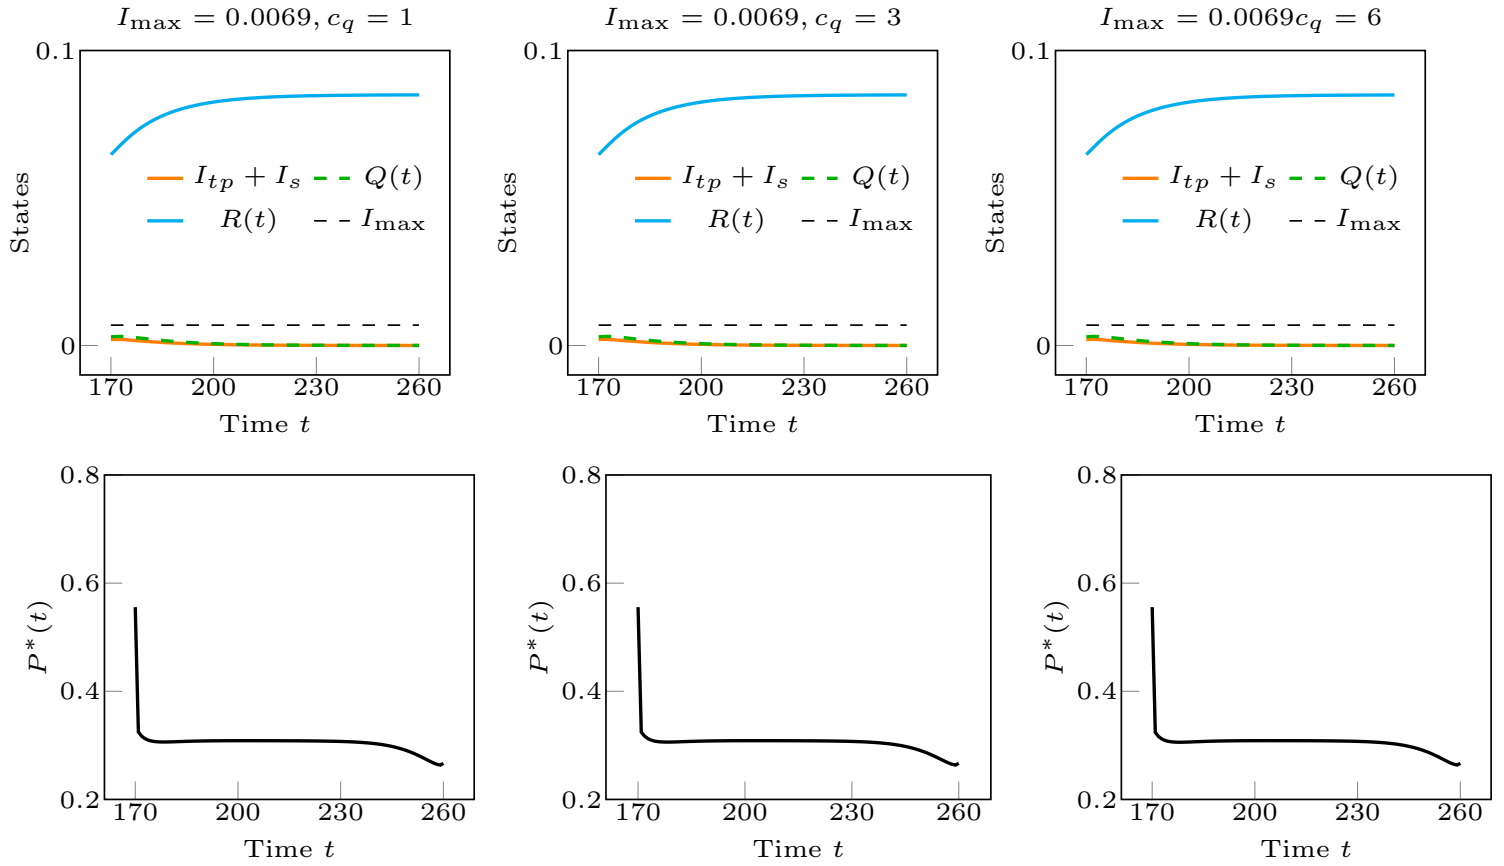

Figure 9: Seattle Scenario.  $I_{\max} = 0.0069$ , maximum of the range.

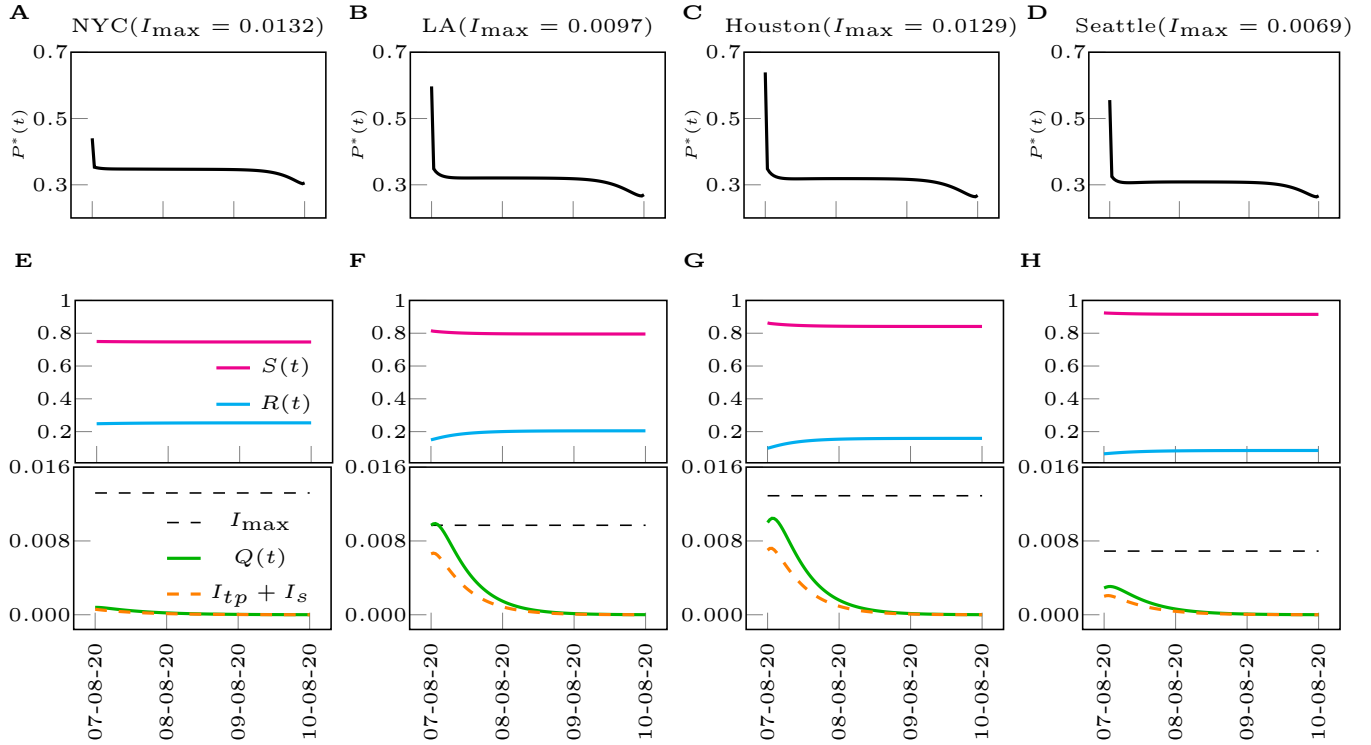

Figure 10: (A-D) Optimal control strategies for the metropolitan cities NYC, LA, Houston, Seattle, respectively. (E-F) Time evolution of the states subject to the optimal control inputs in (A-D).  $I_{\max}$  are chosen as the maximum of the range in Table 3 ( $\rho = 1$ ) and  $c_q = 1$ . The legends in (F-H) are same as the legend in (E).

### Supplementary Note 3: Effects of varying the terminal suppression constraint $\epsilon$

Figures 11, 12, 13, and 14 show the effects of varying the final suppression constraint  $\epsilon$  on the optimal control solutions, for the cases of the Metropolitan Statistical Areas of NYC, LA, Houston, and Seattle, respectively. For all cities, we see that for large enough  $\epsilon$ , solutions of type 2 emerge, for which  $I_{tp}(t) + I_s(t) = I_{max}$  for certain times  $t$ . More specifically, this is seen for  $\epsilon = 3.16 \times 10^{-4}$  and  $\epsilon = 10^{-3}$  in Figs. 11, 12, and 13 and for  $\epsilon = 10^{-3}$  in Fig. 14.

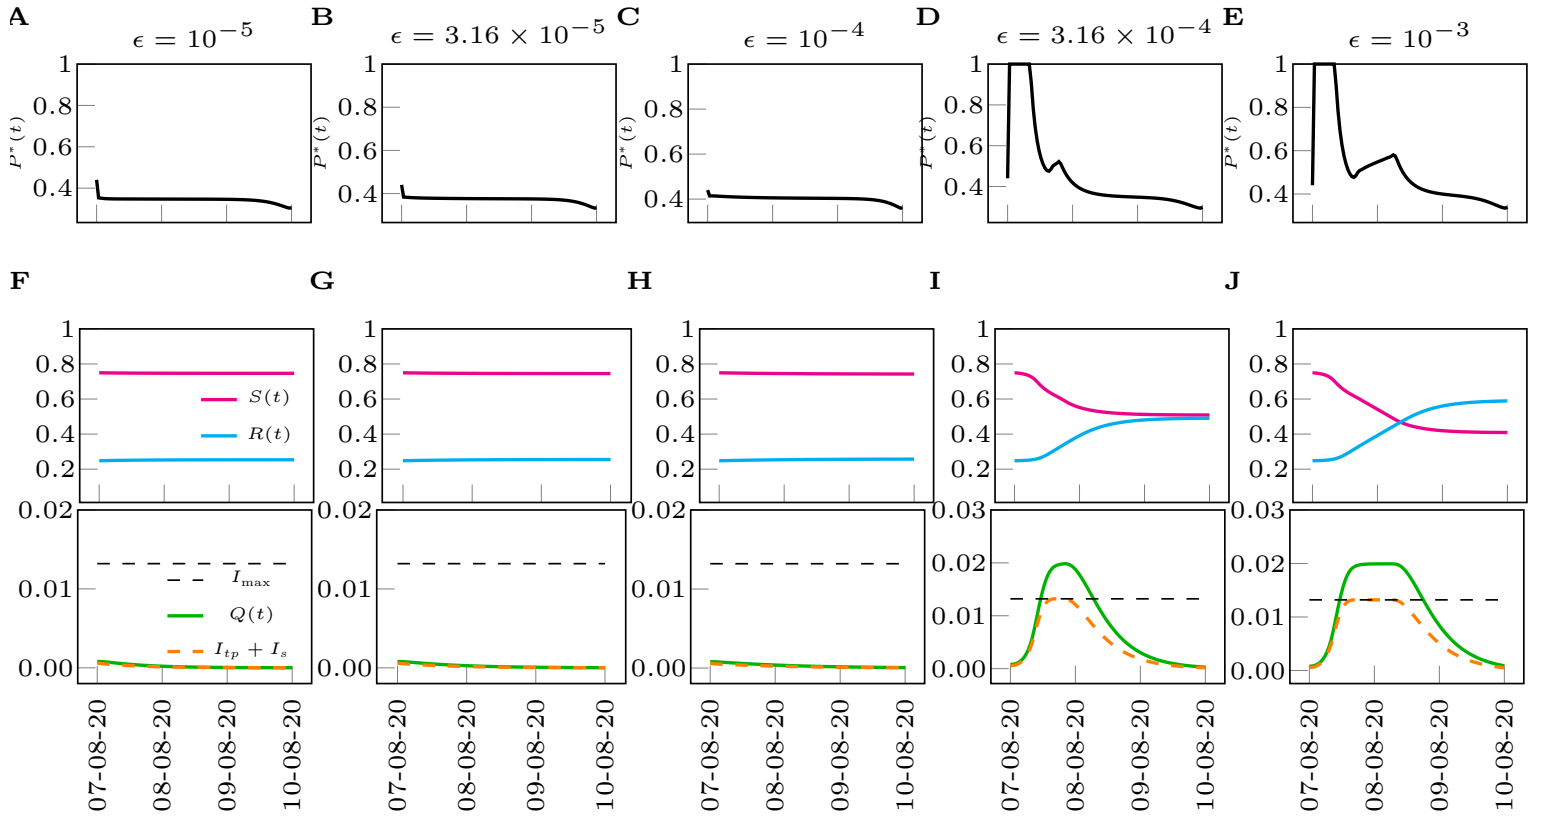

Figure 11: (A-E) Optimal control strategies for the NYC for different values of the parameter  $\epsilon$ . (F-J) Evolutions of the states subject to the optimal control inputs in (A-E).  $I_{\max}$  are chosen from the maximum range of Table 3 of the main manuscript,  $\rho = 1$ .

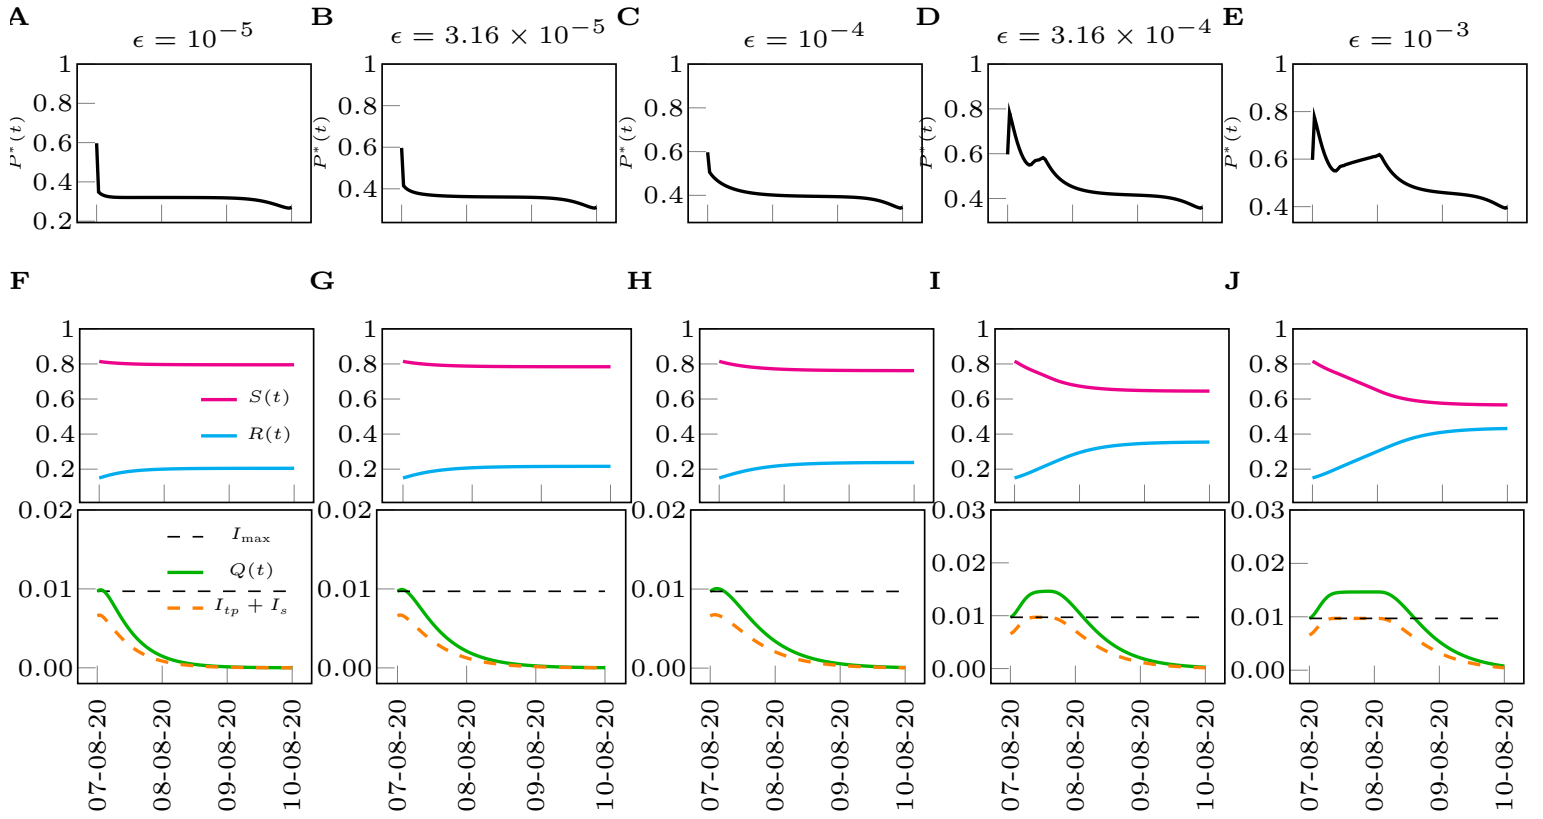

Figure 12: (A-E) Optimal control strategies for LA for different values of the parameter  $\epsilon$ . (F-J) Evolutions of the states subject to the optimal control inputs in (A-E).  $I_{\max}$  are chosen from the maximum range of Table 3 of the main manuscript,  $\rho = 1$ .

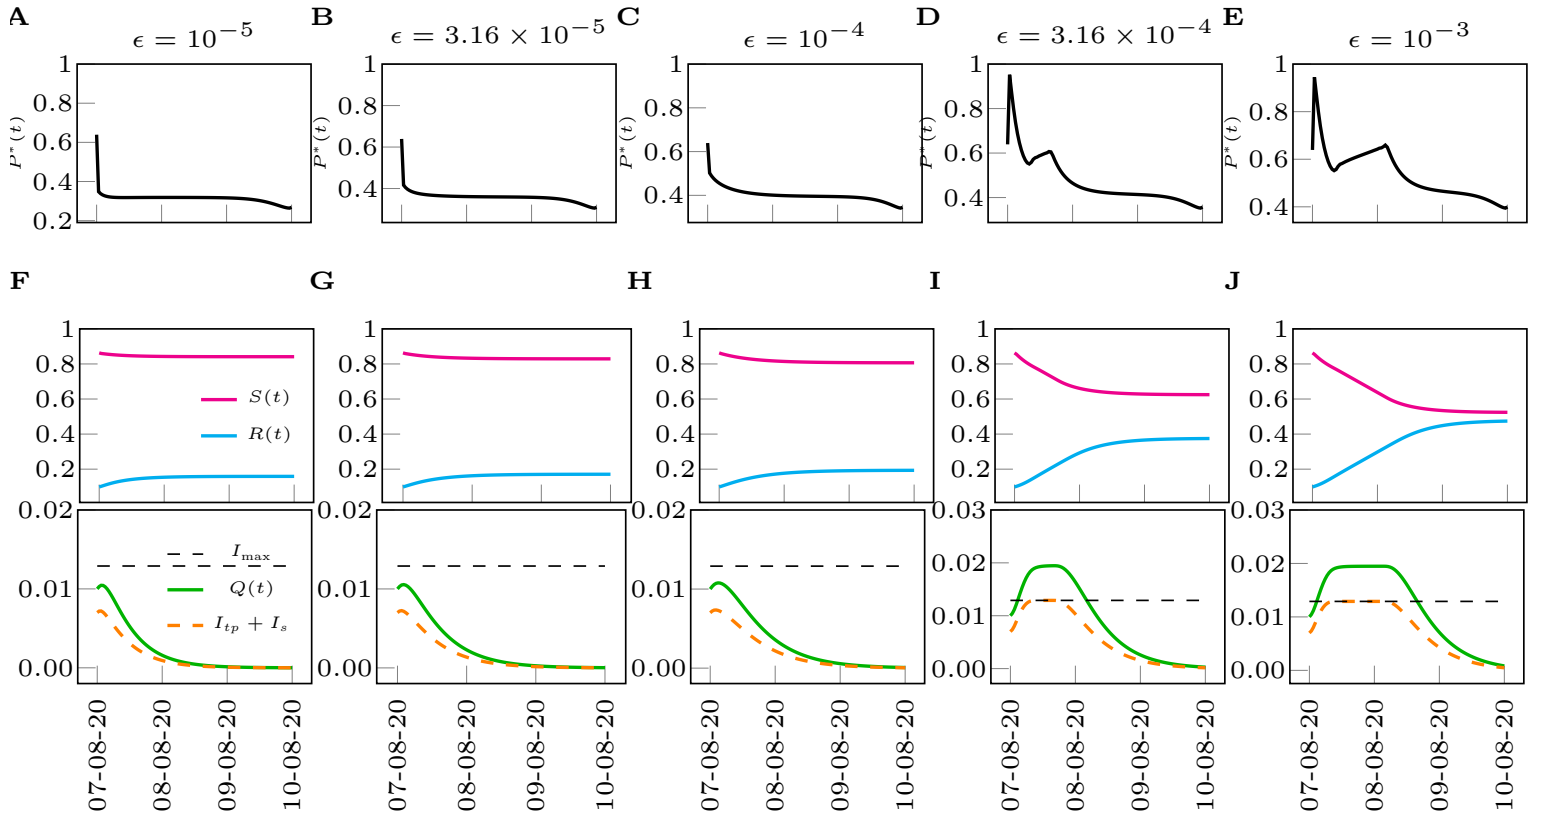

Figure 13: (A-E) Optimal control strategies for Houston for different values of the parameter  $\epsilon$ . (F-J) Evolutions of the states subject to the optimal control inputs in (A-E).  $I_{\max}$  are chosen from the maximum range of Table 3 of the main manuscript,  $\rho = 1$ .

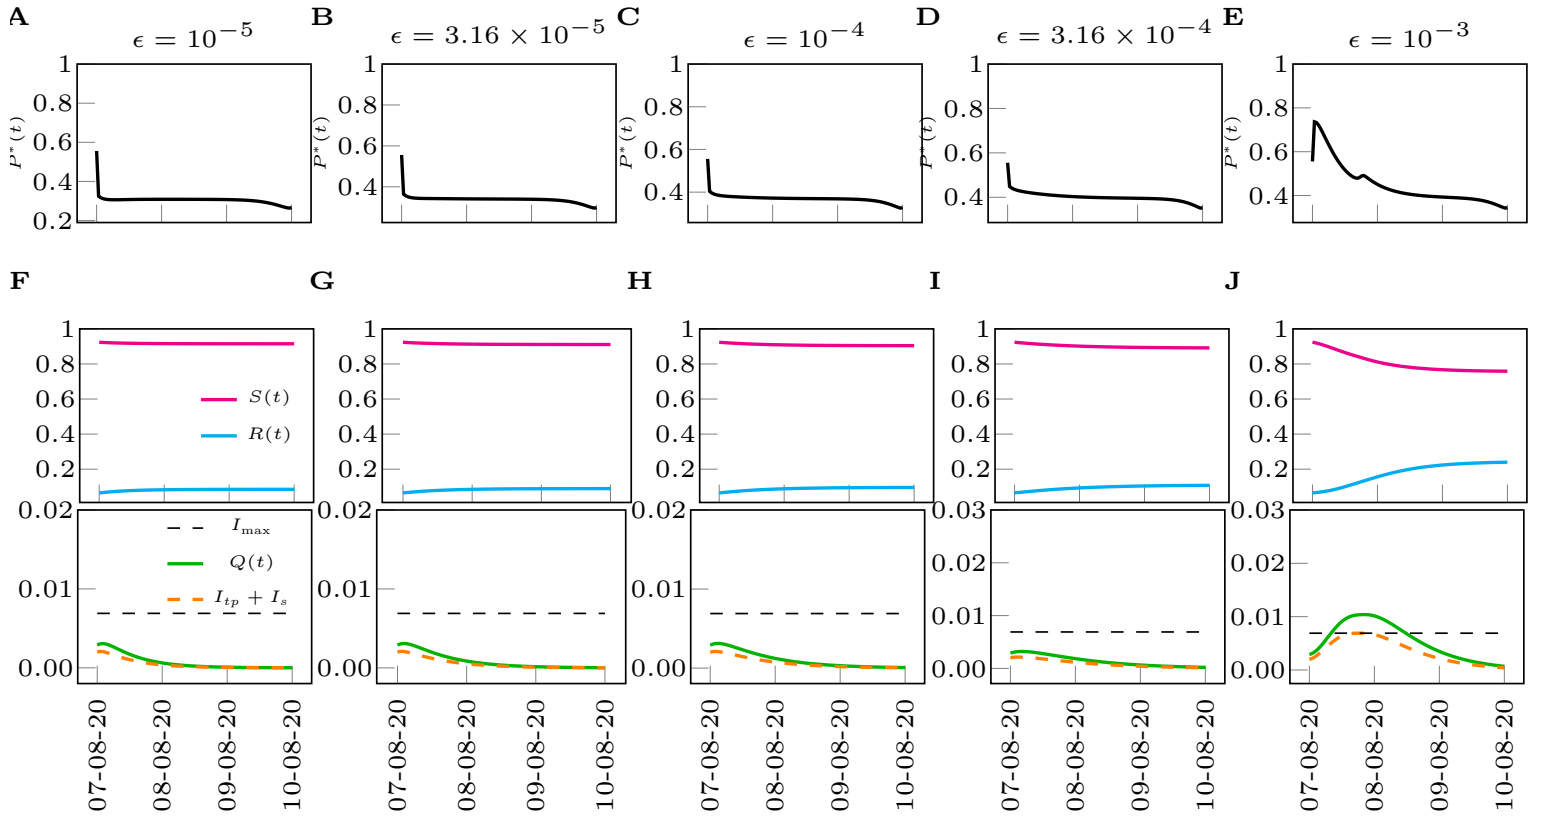

Figure 14: (A-E) Optimal control strategies for Seattle for values of the parameter  $\epsilon$ . (F-J) Evolutions of the states subject to the optimal control inputs in (A-E).  $I_{\max}$  are chosen from the maximum range of Table 3 of the main manuscript,  $\rho = 1$ .

## Supplementary Note 4: Effects of varying $t_f$

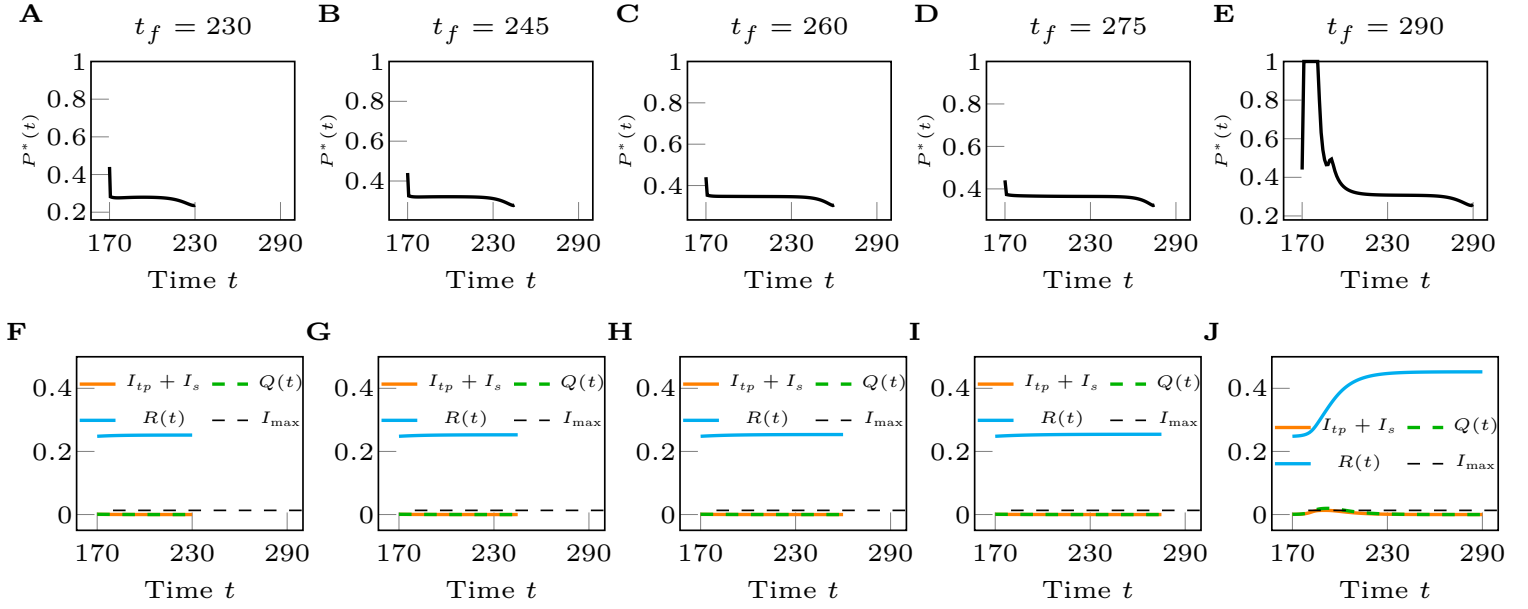

Figure 15: (A-E) Optimal control strategies for the NYC for different final times  $t_f$ . (F-J) Evolutions of the states subject to the optimal control inputs.  $I_{max}$  is chosen as the maximum of the range in Table 3 ( $\rho = 1$ ).



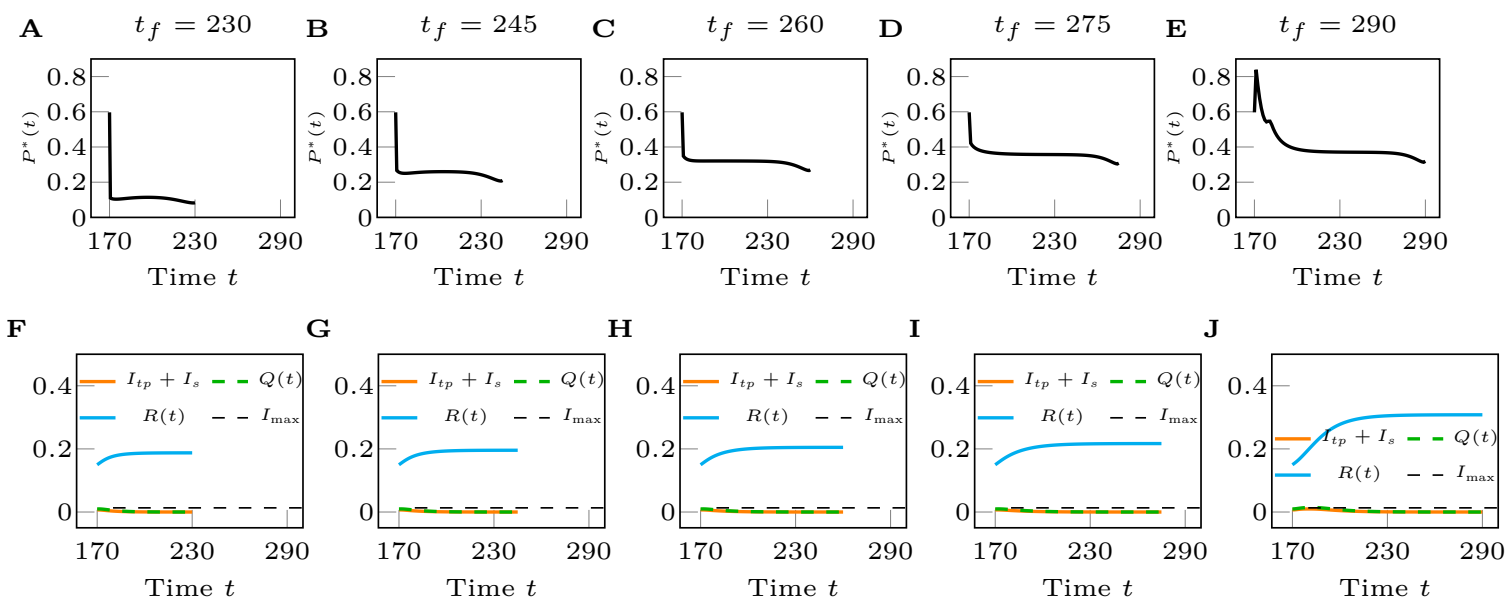

Figure 16: (A-E) Optimal control strategies for LA for different final times  $t_f$ . (F-J) Evolutions of the states subject to the optimal control inputs.  $I_{max}$  are chosen as the maximum of the range in Table 3 ( $\rho = 1$ ) and  $\epsilon = 10^{-5}$ .

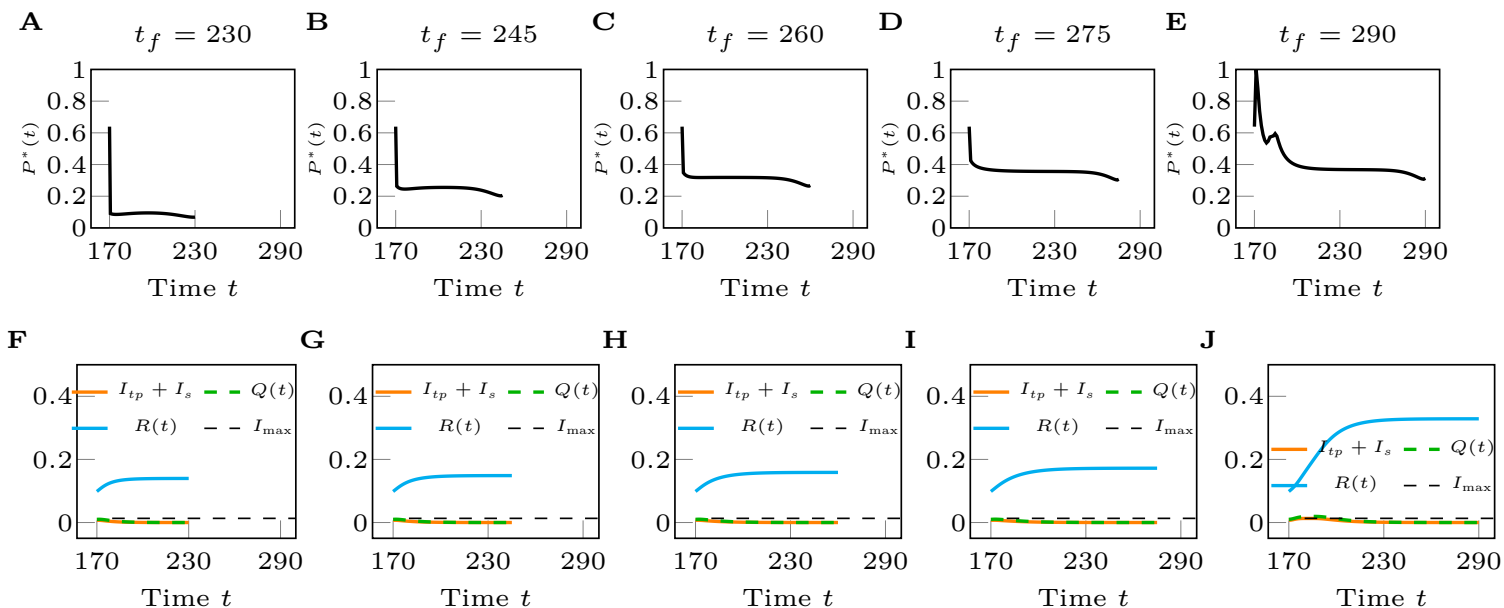

Figure 17: (A-E) Optimal control strategies for Houston for different final times  $t_f$ . (F-J) Evolutions of the states subject to the optimal control inputs.  $I_{max}$  are chosen from the maximum range of Table 3  $I_{max}$  are chosen as the maximum of the range in Table 3 ( $\rho = 1$ ) and  $\epsilon = 10^{-5}$ .

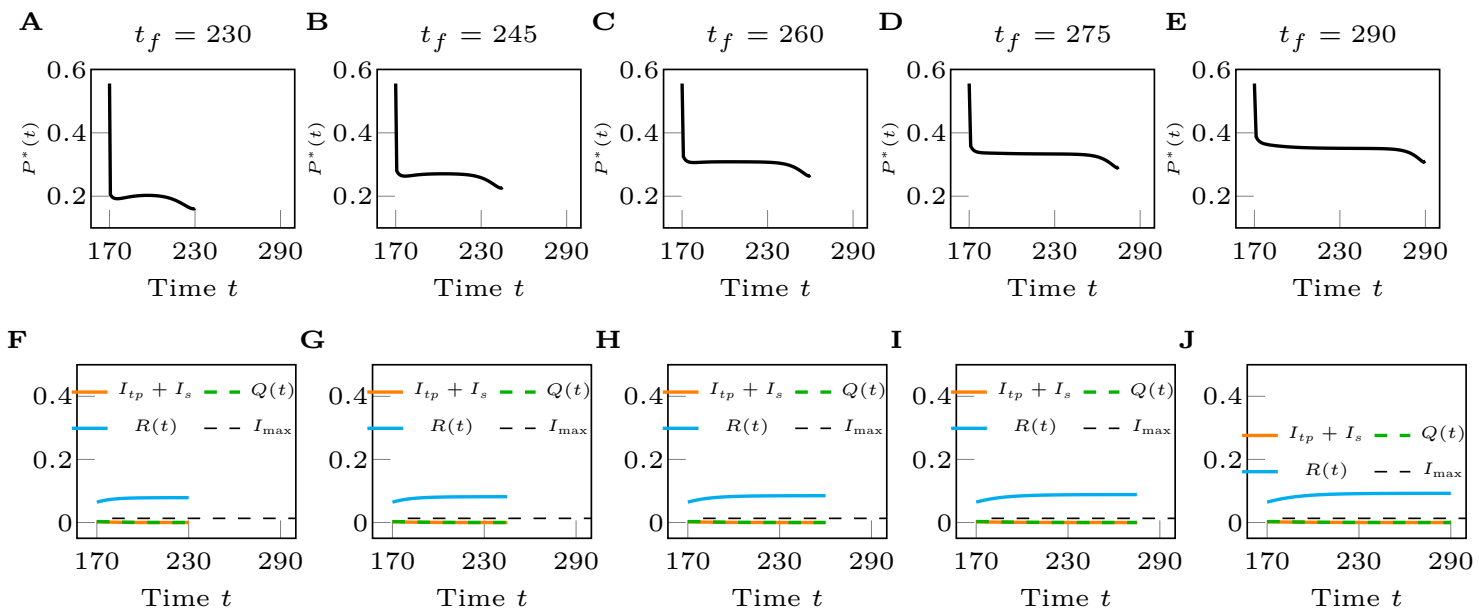

Figure 18: (A-E) Optimal control strategies for Seattle for different final times  $t_f$ . (F-J) Evolutions of the states subject to the optimal control inputs.  $I_{\max}$  are chosen as the maximum of the range in Table 3 ( $\rho = 1$ ) and  $\epsilon = 10^{-5}$ .

## Supplementary Note 5: Detailed comparison of different cities

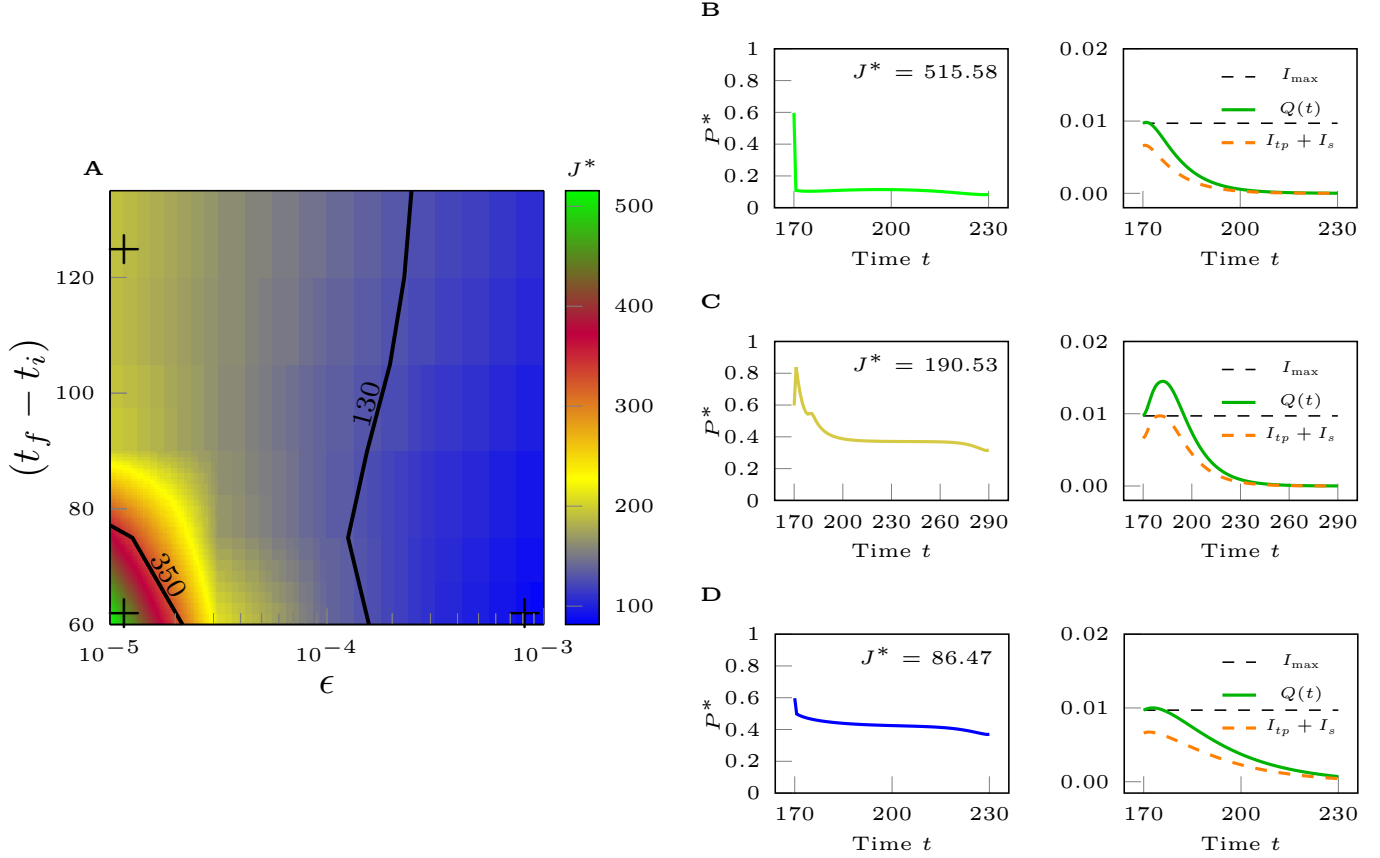

Figure 19: (A) The optimal cost  $J^*$  in the  $(t_f - t_i), \epsilon$  plane. The parameters correspond to the Los Angeles Metropolitan Statistical Area.  $I_{max}$  is chosen as the maximum of the range in Table 3. Type 1 solutions (in green) are more expensive than type 2 solutions (in blue.) The regions in yellow/red correspond to the transition between the two types of solutions. (B-D) Time evolutions of the optimal control inputs and states for three different points of the  $(t_f - t_i)-\epsilon$  plane, points shown as plus signs in (A). The parameter  $c_q$  and  $c_p$  are both set to 1.

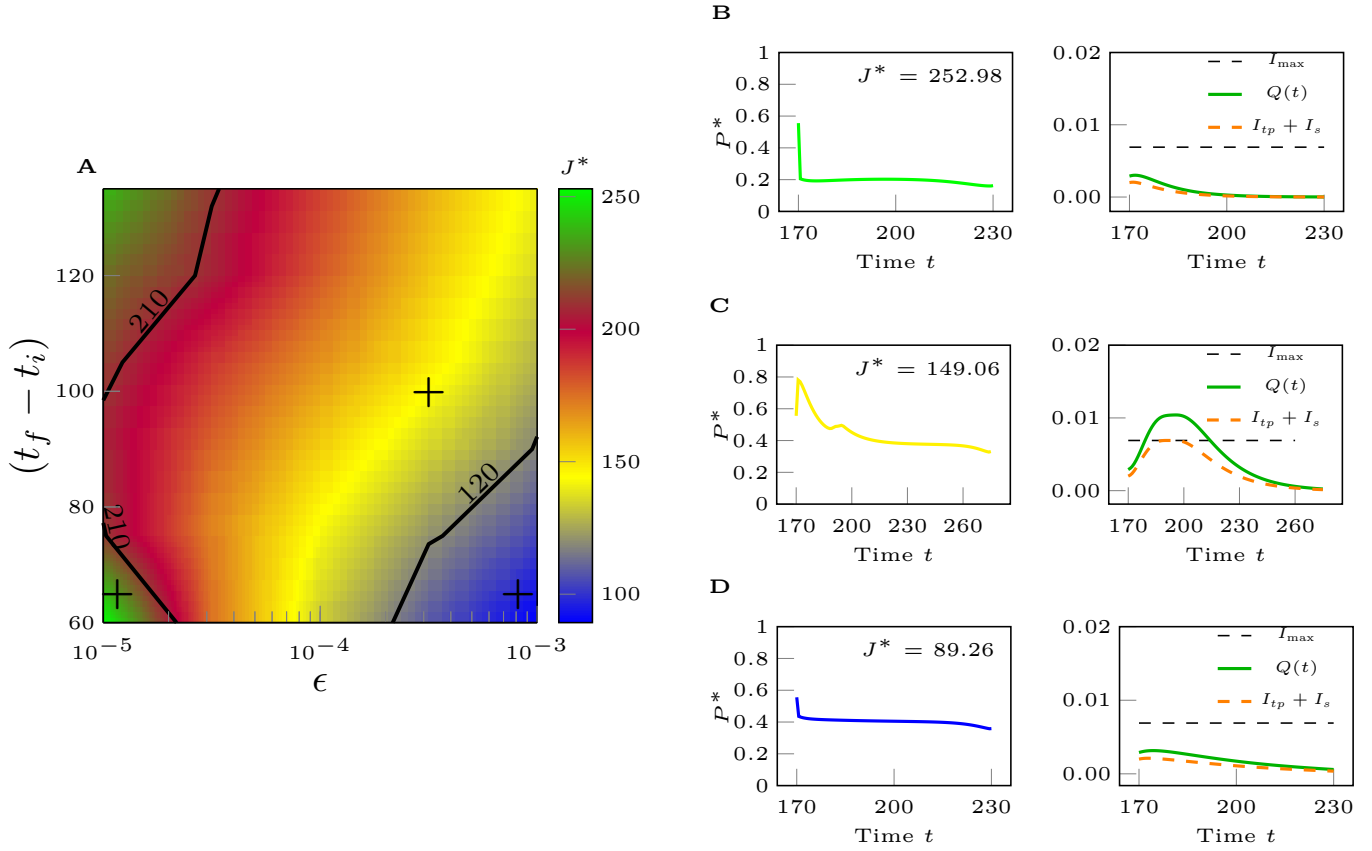

Figure 20: (A) The optimal cost  $J^*$  in the  $(t_f - t_i), \epsilon$  plane. The parameters correspond to the Seattle Metropolitan Statistical Area.  $I_{\max}$  is chosen as the maximum of the range in Table 3. Type 1 solutions (in red) are more expensive than type 2 solutions (in blue.) The regions in yellow and red correspond to the transition between the two types of solutions. (B-D) Time evolutions of the optimal control inputs and states for three different points of the  $(t_f - t_i)$ - $\epsilon$  plane, points shown as plus signs in (A). The parameter  $c_q$  and  $c_p$  are both set to 1.

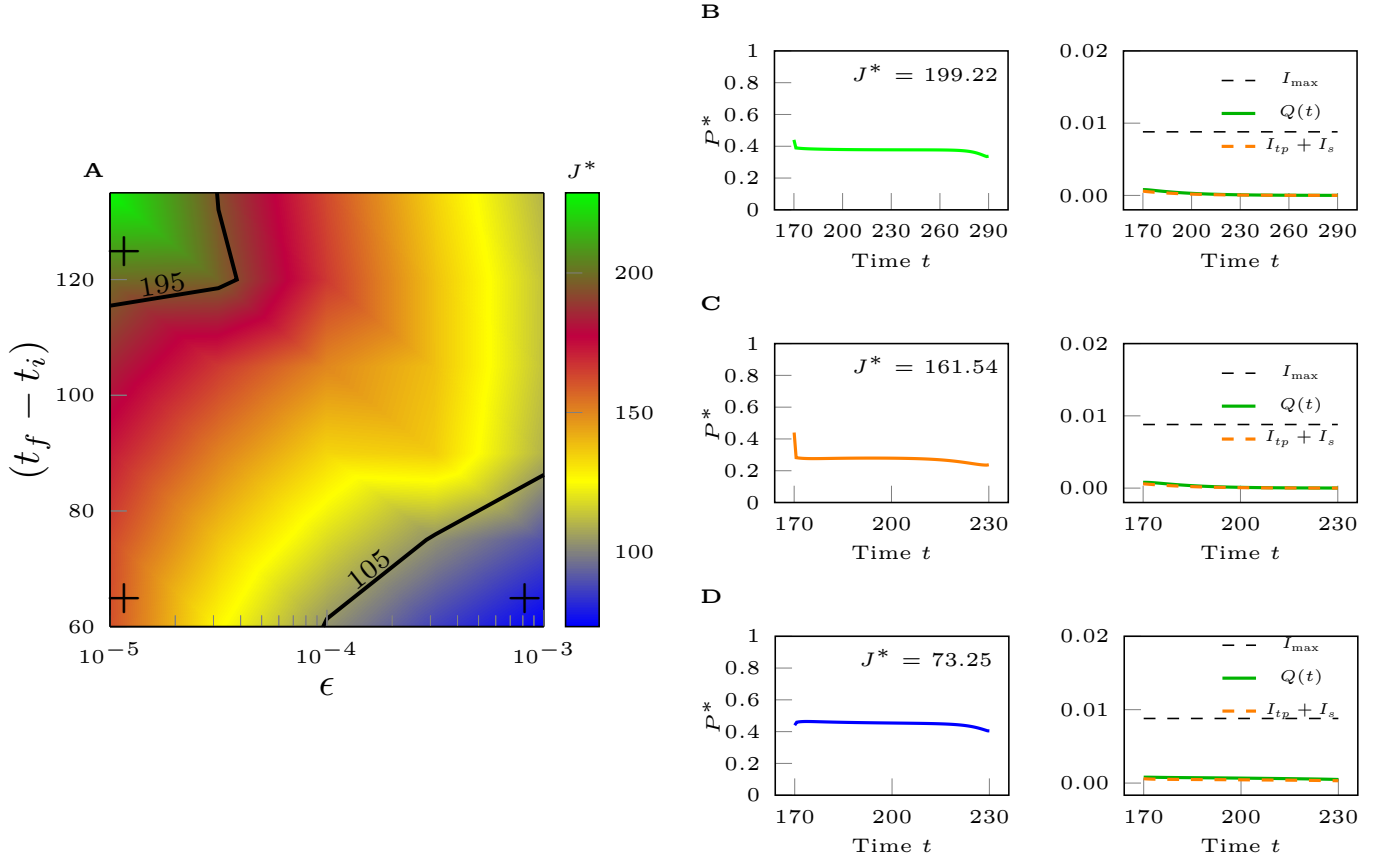

Figure 21: (A) The optimal cost  $J^*$  in the  $(t_f - t_i), \epsilon$  plane. The parameters correspond to the MSA of NYC.  $I_{\max}$  is chosen as the maximum of the range in Table 3. Type 1 solutions (in red) are more expensive than type 2 solutions (in blue.) The regions in yellow and red correspond to the transition between the two types of solutions. (B-D) Time evolutions of the optimal control inputs and states for three different points of the  $(t_f - t_i)$ - $\epsilon$  plane, points shown as plus signs in (A). The parameters  $c_p$  and  $c_q$  are both set to 1.

# Supplementary Note 6: Herd Immunity Solutions

As stated in the main manuscript, herd immunity solutions arise when the control horizon is very large. Figure 22 shows an example of such solution for the case of NYC, when the final time was set equal to  $t_f = 440$ . These solutions are characterized by three phases: (I)  $\dot{I}(t) > 0$  and  $I(t) < I_{\max}$ ,  $t \in [t_i, \tau_1)$ , (II)  $\dot{I}(t) = 0$  and  $I(t) = I_{\max}$ ,  $t \in [\tau_1, \tau_2]$  and (III)  $\dot{I}(t) < 0$  and  $I(t) < I_{\max}$ ,  $t \in (\tau_2, t_f]$ ,  $t_i \leq \tau_1 \leq \tau_2 \leq t_f$ . The second phase has a natural interpretation: one of the objectives is to minimize the usage of social distancing while in the presence of the path constraint  $I(t) \leq I_{\max}$ , which results in setting  $I = I_{\max}$  any time that the number of infected in the absence of controls would exceed  $I_{\max}$ . From simulations we see that this constant infection state corresponds to approximately setting  $\dot{E} = \dot{A} = \dot{Q} = 0$ ,  $t \in [\tau_1, \tau_2]$ . Then, the optimal  $P^*(t)$  typically has a V-shape (see panel A of Fig. 22), with stricter measures of social distancing only in the central phase.

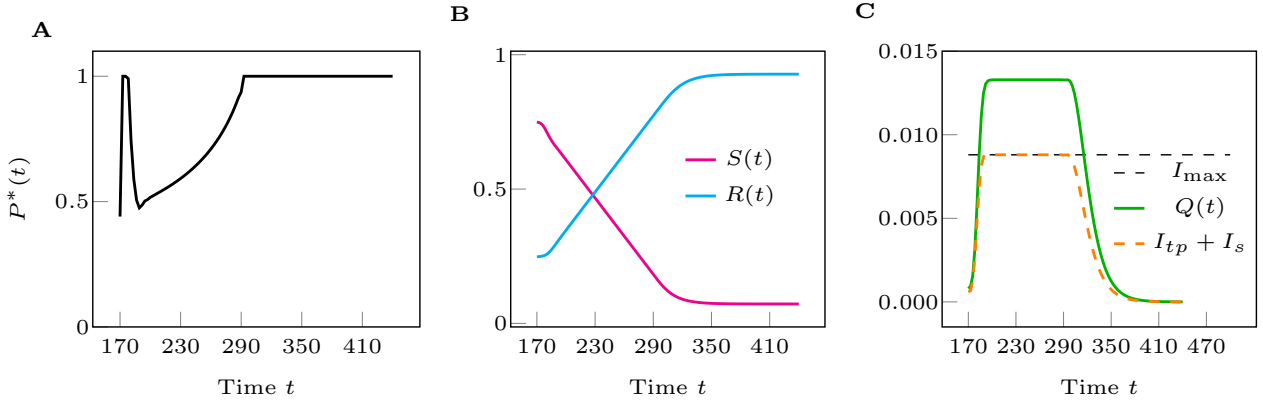

Figure 22: (A) Optimal control strategy for NYC for  $t_f = 440$ . (B-C) Evaluations of the states to the optimal control input.  $I_{\max}$  is chosen as the minimum value in Table 3 ( $\rho = 2/3$ ) and  $\epsilon = 10^{-3}$ . The parameters  $c_p$  and  $c_q$  are both set to 1.

## Supplementary Note 7: Pseudo-spectral Optimal Control

Pseudo-Spectral Optimal Control (PSOC) is a computational method for solving optimal control problems. PSOC [3, 5] has provided a numerical tool to let scientists and engineers solve optimal control problems

$$\begin{aligned}
 \min_{\mathbf{u}(t)} \quad & J(\mathbf{x}(t), \mathbf{u}(t), t) = E(\mathbf{x}(t_i), \mathbf{x}(t_f), t_i, t_f) + \int_{t_i}^{t_f} F(\mathbf{x}(t), \mathbf{u}(t), t) dt \\
 \text{s.t.} \quad & \dot{\mathbf{x}}(t) = \mathbf{f}(\mathbf{x}(t), \mathbf{u}(t), t) \\
 & \mathbf{e}^L \leq \mathbf{e}(\mathbf{x}(t_i), \mathbf{x}(t_f), t_i, t_f) \leq \mathbf{e}^U \\
 & \mathbf{h}^L \leq \mathbf{h}(\mathbf{x}(t), \mathbf{u}(t), t) \leq \mathbf{h}^U \\
 & t \in [t_i, t_f]
 \end{aligned} \tag{1}$$

reliably and efficiently in applications such as guiding autonomous vehicles and maneuvering the international space station [5]. PSOC is an approach by which an OCP can be discretized by approximating the integrals by quadratures and the time-varying states and control inputs with interpolating polynomials. Here we summarize the main concepts behind the PSOC. We choose a set of  $N + 1$  discrete times  $\{\tau_i\}$   $i = 0, 1, \dots, N$  where  $\tau_0 = -1$  and  $\tau_N = 1$  with a mapping between  $t \in [t_i, t_f]$  and  $\tau \in [-1, 1]$ . The discretization scheme includes the endpoints and is normalized by the mapping,

$$t = \frac{t_f - t_i}{2}\tau + \frac{t_f + t_i}{2} \tag{2}$$

The times  $\{\tau_i\}$  are chosen as the roots of an  $(N + 1)$ th order orthogonal polynomial such as Legendre polynomials or Chebyshev polynomials. The choice of discretization scheme is important to the convergence of the full discretized problem. For instance, if we choose the roots of a Legendre polynomial as the discretization scheme, the associated quadrature weights can be found in the typical way for Gauss quadrature. The time-varying states and control inputs are found by approximating them with Lagrange interpolating polynomials,

$$\hat{\mathbf{x}}(\tau) = \sum_{i=0}^N \hat{\mathbf{x}}_i L_i(\tau) \tag{3a}$$

$$\hat{\mathbf{u}}(\tau) = \sum_{i=0}^N \hat{\mathbf{u}}_i L_i(\tau), \tag{3b}$$

where  $\hat{\mathbf{x}}(\tau)$  and  $\hat{\mathbf{u}}(\tau)$  are the approximations of  $\mathbf{x}(\tau)$  and  $\mathbf{u}(\tau)$ , respectively, and  $L_i(\tau)$  is the  $i$ th Lagrange interpolating polynomial. The Lagrange interpolating polynomials are defined as,

$$L_i(\tau) = \prod_{j=0, j \neq i}^N \frac{\tau - \tau_j}{\tau_i - \tau_j} \tag{4}$$



The dynamical system is approximated by differentiating the approximation  $\hat{\mathbf{x}}(\tau) = \sum_{i=0}^N \hat{\mathbf{x}}_i L_i(\tau)$  with respect to time.

$$\frac{d\hat{\mathbf{x}}}{d\tau} = \sum_{i=0}^N \hat{\mathbf{x}}_i \frac{dL_i}{d\tau} \quad (5)$$

Let  $D_{k,i} = \frac{d}{d\tau} L_i(\tau_k)$  which allows one to rewrite the original dynamical system constraints in (1) as the following set of algebraic constraints.

$$\begin{aligned} \sum_{i=0}^N D_{k,i} \hat{\mathbf{x}}_i - \frac{t_f - t_i}{2} \mathbf{f}(\hat{\mathbf{x}}_k, \hat{\mathbf{u}}_k, \tau_k) &= \mathbf{0}_n, \quad k = 1, \dots, N \\ \hat{\mathbf{x}}_N - \hat{\mathbf{x}}_0 - \sum_{k=1}^N \sum_{i=0}^N w_k D_{k,i} \hat{\mathbf{x}}_i &= \mathbf{0}_n \end{aligned} \quad (6)$$

The last set of algebraic constraints arise from the consistency condition  $\int_{t_i}^{t_f} \dot{\mathbf{x}}(t) dt = \mathbf{x}(t_f) - \mathbf{x}_0$ . Similarly to the consistency condition, the integral in the cost function is,

$$J = \int_{t_i}^{t_f} F(\mathbf{x}, \mathbf{u}, t) \approx \hat{J} = \frac{t_f - t_i}{2} \sum_{k=1}^N F(\hat{\mathbf{x}}_k, \hat{\mathbf{u}}_k, \tau_k) \quad (7)$$

The original time-varying states, control inputs, the dynamical equations constrained and the cost function are now discretized approximation of the continuous NLP problem. Thus the discretized approximation of the original OCP is compiled into the following nonlinear programming (NLP) problem.

$$\begin{aligned} \min_{\mathbf{u}_i, i=0, \dots, N} \quad & \hat{J} = \frac{t_f - t_i}{2} \sum_{i=0}^N w_i f(\hat{\mathbf{x}}_i, \hat{\mathbf{u}}_i, \tau_i) \\ \text{s.t.} \quad & \sum_{i=0}^N D_{k,i} \hat{\mathbf{x}}_i - \frac{t_f - t_i}{2} \mathbf{f}(\hat{\mathbf{x}}_k, \hat{\mathbf{u}}_k, \tau_k) = \mathbf{0}, \quad k = 0, \dots, N \\ & \hat{\mathbf{x}}_N - \hat{\mathbf{x}}_0 - \sum_{k=1}^N \sum_{i=0}^N w_k D_{k,i} \hat{\mathbf{x}}_i = \mathbf{0}_n \\ & \mathbf{e}^L \leq \mathbf{e}(\hat{\mathbf{x}}_0, \hat{\mathbf{x}}_N, \tau_0, \tau_N) \leq \mathbf{e}^U \\ & \mathbf{h}^L \leq \mathbf{h}(\hat{\mathbf{x}}_k, \hat{\mathbf{u}}_k, \tau_k) \leq \mathbf{h}^U, \quad k = 0, \dots, N \\ & t_i = \frac{t_f - t_i}{2} \tau_i + \frac{t_f + t_i}{2} \end{aligned} \quad (8)$$

With the above results, we now present the application to the full multi-phase optimal control problem. In general, let us assume there are  $p > 1$  phases where we set  $p = 2$  for simplicity. Each phase is active within

the interval  $t \in [t_i^{(p)}, t_f^{(p)}]$ . In each phase there is a cost function  $J^{(p)}$ , a dynamical system  $\mathbf{f}^{(p)}$ , a set of endpoint constraints  $\mathbf{e}^{(p)}$ , and a set of path constraints  $\mathbf{h}^{(p)}$ . If two phases,  $p$  and  $q$ , are linked, then there also exists a set of linkage constraints  $\Phi^{(p,q)}$ .

$$\begin{aligned}
\min_{\mathbf{u}^{(p)}} \quad & \sum_{p=1}^P J^{(p)} = \sum_{p=1}^P \int_{t_i^{(p)}}^{t_f^{(p)}} F^{(p)}(\mathbf{x}^{(p)}, \mathbf{u}^{(p)}, t) dt \\
\text{s.t.} \quad & \dot{\mathbf{x}}^{(p)}(t) = \mathbf{f}^{(p)}(\mathbf{x}^{(p)}, \mathbf{u}^{(p)}, t) \\
& \mathbf{h}^{L,(p)} \leq \mathbf{h}^{(p)}(\mathbf{x}^{(p)}, \mathbf{u}^{(p)}, t) \leq \mathbf{h}^{U,(p)} \\
& \mathbf{e}^{L,(p)} \leq \mathbf{e}^{(p)}(\mathbf{x}^{(p)}(t_i^{(p)}), \mathbf{x}^{(p)}(t_f^{(p)}), t_i^{(p)}, t_f^{(p)}) \leq \mathbf{e}^{U,(p)} \\
& \Phi^{L,(p,q)} \leq \Phi^{(p,q)}(\mathbf{x}^{(p)}, \mathbf{x}^{(q)}, \mathbf{u}^{(p)}, \mathbf{u}^{(q)}) \leq \Phi^{U,(p,q)}
\end{aligned} \tag{9}$$

Each phase is discretized with its own set of points,  $\{\tau_i^{(p)}\}$  so that,

$$\mathbf{x}^{(p)}(\tau) \approx \hat{\mathbf{x}}^{(p)}(\tau) = \sum_{i=1}^N \hat{\mathbf{x}}_i^{(p)} L_i(\tau) \tag{10}$$

so that the full multi-phase NLP is,

$$\begin{aligned}
\min_{\mathbf{u}_i^{(p)}} \quad & \sum_{p=1}^P \frac{t_f^{(p)} - t_i^{(p)}}{2} \sum_{k=1}^N F^{(p)}(\hat{\mathbf{x}}_k^{(p)}, \hat{\mathbf{u}}_k^{(p)}, \tau_k) \\
\text{s.t.} \quad & \sum_{i=0}^N D_{k,i} \hat{\mathbf{x}}_i^{(p)} - \frac{t_f^{(p)} - t_i^{(p)}}{2} \mathbf{f}^{(p)}(\hat{\mathbf{x}}_k^{(p)}, \hat{\mathbf{u}}_k^{(p)}, \tau_k) = \mathbf{0}_n, \quad p = 1, \dots, P, \quad k = 1, \dots, N \\
& \hat{\mathbf{x}}_N^{(p)} - \hat{\mathbf{x}}_0^{(p)} - \frac{t_f^{(p)} - t_i^{(p)}}{2} \sum_{k=1}^N \sum_{i=0}^N w_k D_{k,i} \hat{\mathbf{x}}_i = \mathbf{0}_n, \quad p = 1, \dots, P \\
& \mathbf{e}^{L,(p)} \leq \mathbf{e}^{(p)}(\hat{\mathbf{x}}_0^{(p)}, \hat{\mathbf{x}}_N^{(p)}, t_i^{(p)}, t_f^{(p)}) \leq \mathbf{e}^{U,(p)}, \quad p = 1, \dots, P \\
& \mathbf{h}^{L,(p)} \leq \mathbf{h}^{(p)}(\hat{\mathbf{x}}_k^{(p)}, \hat{\mathbf{u}}_k^{(p)}, \tau_k) \leq \mathbf{h}^{U,(p)}, \quad k = 1, \dots, N, \quad p = 1, \dots, P \\
& \Phi^{L,(p,q)} \leq \Phi^{(p,q)}(\hat{\mathbf{x}}_0^{(p)}, \hat{\mathbf{u}}_0^{(p)}, \hat{\mathbf{x}}_N^{(q)}, \hat{\mathbf{u}}_N^{(q)}) \leq \Phi^{U,(p,q)}, \quad p, q = 1, \dots, P
\end{aligned} \tag{11}$$

To perform the discretization described in this subsection, we use the open-source C++ PSOC package *PSOPT* [1].

Next we show that Eq. (11) can be expressed in the typical NLP form [2]. Let  $\mathbf{z}^{(p)}$  contain all of the variables

for phase  $p$ .

$$\mathbf{z}^{(p)} = \begin{bmatrix} \hat{\mathbf{x}}_0^{(p)} \\ \vdots \\ \hat{\mathbf{x}}_N^{(p)} \\ \hat{\mathbf{u}}_0^{(p)} \\ \vdots \\ \hat{\mathbf{u}}_N^{(p)} \end{bmatrix} \in \mathbb{R}^{(n+m)} \quad (12)$$

Next, let  $\mathbf{z}$  contain the variables for every phase,

$$\mathbf{z} = \begin{bmatrix} \mathbf{z}^{(1)} \\ \vdots \\ \mathbf{z}^{(P)} \end{bmatrix} \in \mathbb{R}^{(N+1)(n+m)} \quad (13)$$

With some algebraic manipulation, the entire discretized multi-phase OCP can be rewritten as an NLP in the typical form.

$$\begin{aligned} \min_{\mathbf{z}} \quad & c(\mathbf{z}) \\ \text{s.t.} \quad & \mathbf{g}(\mathbf{z}) = \mathbf{0} \\ & \mathbf{d}(\mathbf{z}) \leq \mathbf{0} \end{aligned} \quad (14)$$

To solve the large-scale NLP in Eq. (14) we employ an interior-point algorithm [2]. Specific details of the algorithm are outside the scope of this paper. We used the open-source C++ package IPOPT [6] to solve each instance of Eq. (14). We direct interested readers who would like to learn more about the technical details involved when solving Eq. (14) to the documentation provided with IPOPT.

The optimal solution returned,  $\mathbf{z}^*$ , is separated into its component parts; first by splitting it into the phases  $\mathbf{z}^{(p)*}$ , and second by reconstructing the discrete states and control inputs,  $\hat{\mathbf{x}}_i^*$  and  $\hat{\mathbf{u}}_i^*$ . The continuous time control inputs and states are then reconstructed using the Lagrange interpolating polynomials in Eq. (3). With the continuous time states and control inputs,  $\mathbf{x}^*(t)$  and  $\mathbf{u}^*(t)$ , we then verify that the necessary conditions are met to within an acceptable tolerance.

## Supplementary Note 8: Necessary Conditions for PSOC Solutions

We can use the Pontryagin's principle to drive a set of necessary conditions which a candidate solution must satisfy to be an optimal solution of the OCP in (1) [4]. In Ref. [4], the so-called HAMVET procedure has been proposed based on a slightly modified version of Pontryagin's principle to provide the necessary conditions for the general OCP in (1). We use the conditions to verify that the solution is optimal. The HAMVET procedure is based on the following steps:

- Construction of the Hamiltonian : (H)
- Adjoint equations : (A)
- Minimization of the Hamiltonian : (M)
- Evaluation of the Hamiltonian Value condition : (V)
- Evolution of the Hamiltonian : (E)
- Transversality conditions : (T)

In what follows, we construct the necessary conditions for the general OCP based on the HAMVET procedure. A detailed analysis can be found in Ref. [4].

## Construction of the Hamiltonian

The *Hamiltonian*  $H$  corresponding to the general OPC problem is

$$H(\boldsymbol{\lambda}, \mathbf{x}, \mathbf{u}, t) = F(\mathbf{x}, \mathbf{u}, t) + \boldsymbol{\lambda}^T \mathbf{f}(\mathbf{x}, \mathbf{u}, t) \quad (15)$$

where  $\boldsymbol{\lambda}(t) \in \mathbb{R}^n$  is the *adjoint covector* which is a function of time  $t$ . The control input that minimizes the OCP satisfies the Hamiltonian Minimization Condition (HMC), that is,

$$(HMC) \quad \begin{cases} \min_{u(t)} & H(\boldsymbol{\lambda}, \mathbf{x}, \mathbf{u}, t) \\ \text{s.t.} & \mathbf{h}^L \leq \mathbf{h}(\mathbf{x}, \mathbf{u}, t) \leq \mathbf{h}^U \end{cases} \quad (16)$$

## Adjoint equations

The Karush-Kuhn-Tucker (KKT) conditions can be used to solve the HMC. We define the *Lagrangian of the Hamiltonian*  $\bar{H}$  as

$$\bar{H}(\boldsymbol{\mu}, \boldsymbol{\lambda}, \mathbf{x}, \mathbf{u}, t) = H(\boldsymbol{\lambda}, \mathbf{x}, \mathbf{u}, t) + \boldsymbol{\mu}^T \mathbf{h}(\mathbf{x}, \mathbf{u}, t) \quad (17)$$

where  $\boldsymbol{\mu}(t) \in \mathbb{R}^h$  is the *path covector* which is a function of time  $t$ . Then the evolution of the adjoint covector  $\boldsymbol{\lambda}(t)$  is given by,

$$-\dot{\boldsymbol{\lambda}} = \frac{\partial \bar{H}}{\partial \mathbf{x}} \quad (18)$$

Note that condition in (18) enforces the continuity but not differentiability of  $\boldsymbol{\lambda}(t)$ . So, the piecewise continuity of  $\boldsymbol{\lambda}(t)$  is a necessary condition for an optimal control solution.

## Minimization of the Hamiltonian

By the KKT condition, the minimization condition for the Hamiltonian yields

$$\frac{\partial \bar{H}}{\partial \mathbf{u}} = \mathbf{0} \quad (19)$$

with the complementary conditions for path constraints,

$$\begin{cases} \mu_i \leq 0 & \text{if} & h_i(\mathbf{x}, \mathbf{u}, t) = h_i^L \\ \mu_i = 0 & \text{if} & h_i^L < h_i(\mathbf{x}, \mathbf{u}, t) < h_i^U \\ \mu_i \geq 0 & \text{if} & h_i(\mathbf{x}, \mathbf{u}, t) = h_i^U \\ \mu_i \text{ unrestricted} & \text{if} & h_i^L = h_i^U \end{cases} \quad (20)$$

If there are path constraints, then one of the necessary conditions is

$$\mu_i(t)(h_i - h_i^L)(h_i - h_i^U) = 0 \quad (21)$$

Along with the minimization of the Hamiltonian, there is an endpoint minimization condition (EMC) as well. The endpoint minimization problem is defined as

$$(EMC) \quad \begin{cases} \min & E(\mathbf{x}(t_i), \mathbf{x}(t_f), t_i, t_f) \\ \text{s.t.} & \mathbf{e}^L \leq \mathbf{e}(\mathbf{x}(t_i), \mathbf{x}(t_f), t_i, t_f) \leq \mathbf{e}^U \end{cases} \quad (22)$$

To solve the EMC by KKT, we define the *endpoint Lagrangian*  $\bar{E}$  as

$$\begin{aligned} \bar{E}(\boldsymbol{\nu}, \mathbf{x}(t_i), \mathbf{x}(t_f), t_i, t_f) &= E(\mathbf{x}(t_i), \mathbf{x}(t_f), t_i, t_f) \\ &+ \boldsymbol{\nu}^T \mathbf{e}(\mathbf{x}(t_i), \mathbf{x}(t_f), t_i, t_f) \end{aligned} \quad (23)$$

where  $\boldsymbol{\nu} \in \mathbb{R}^e$  is the *endpoint covector*. Note that,  $\boldsymbol{\nu}$  is a constant vector. The complementary conditions for event constraints are given by

$$\begin{cases} \nu_i \leq 0 & \text{if} & e_i(\mathbf{x}(t_i), \mathbf{x}(t_f), t_i, t_f) = e_i^L \\ \nu_i = 0 & \text{if} & e_i^L < e_i(\mathbf{x}(t_i), \mathbf{x}(t_f), t_i, t_f) < e_i^U \\ \nu_i \geq 0 & \text{if} & e_i(\mathbf{x}(t_i), \mathbf{x}(t_f), t_i, t_f) = e_i^U \\ \nu_i \text{ unrestricted} & \text{if} & e_i^L = e_i^U \end{cases} \quad (24)$$

## Hamiltonian Value condition

The *lower Hamiltonian*  $\mathcal{H}$  is defined as the Hamiltonian evaluated at  $\mathbf{u}(t) = \mathbf{u}^*(t)$ , the solution to the HMC problem, i.e.,

$$\mathcal{H} = \min_{\mathbf{u} \in \mathbb{U}} H(\boldsymbol{\lambda}, \mathbf{x}, \mathbf{u}, t) \quad (25)$$

where  $\mathbb{U}$  is the set of feasible control inputs, i.e., they satisfy all of the constraints imposed by Eq. (1). The lower Hamiltonian must satisfy the endpoint value conditions as a regular Hamiltonian

$$\begin{aligned} \mathcal{H}(\boldsymbol{\lambda}(t_i), \mathbf{x}(t_i), t_i) &= \frac{\partial \bar{E}}{\partial t_i} \\ \mathcal{H}(\boldsymbol{\lambda}(t_f), \mathbf{x}(t_f), t_f) &= -\frac{\partial \bar{E}}{\partial t_f} \end{aligned} \quad (26)$$

which provides another necessary conditions to check for the optimal control solution.

## Time Evolution of the Hamiltonian

As the lower Hamiltonian  $\mathcal{H}$  is obtained from the evaluation of the Hamiltonian at the  $\mathbf{u}^*(t)$ ,  $\mathbf{x}^*(t)$  and  $\boldsymbol{\lambda}^*(t)$ , where  $\mathbf{x}^*(t)$  and  $\boldsymbol{\lambda}^*(t)$  are the states and costates associated with the optimal control solution  $\mathbf{u}^*(t)$ ,  $\mathcal{H}$  is a function of time  $t$  only. Thus the evolution of the lower Hamiltonian  $\mathcal{H}$  can be defined as

$$\dot{\mathcal{H}} = \frac{d\mathcal{H}}{dt} = \frac{\partial H}{\partial t} \quad (27)$$

If  $H$  in (15) does not depend explicitly on time, then another necessary condition is

$$\dot{\mathcal{H}} = 0 \quad \text{or} \quad \mathcal{H} = \text{constant} \quad (28)$$

## Transversality conditions

The endpoints of the adjoint covector  $\boldsymbol{\lambda}(t)$  are related to the partial derivatives of the endpoint Lagrangian  $\bar{E}$ . The transversality conditions for the adjoint covector  $\boldsymbol{\lambda}(t)$  are

$$\boldsymbol{\lambda}(t_i) = -\frac{\partial \bar{E}}{\partial \mathbf{x}(t_i)} \quad \text{and} \quad \boldsymbol{\lambda}(t_f) = \frac{\partial \bar{E}}{\partial \mathbf{x}_f} \quad (29)$$

## Supplementary Note 9: Non-Normalized Equations

Consider the non-normalized quantities in the variables  $\hat{S}(t) = NS(t)$ ,  $\hat{E}(t) = NE(t)$ ,  $\hat{A}(t) = NA(t)$ ,  $\hat{I}(t) = NI(t)$ ,  $\hat{I}_{tp}(t) = NI_{tp}(t)$ ,  $\hat{Q}(t) = NQ(t)$ ,  $\hat{R}(t) = NR(t)$ , where  $N$  is the total number of individuals in the population, such as  $\hat{S}(t) + \hat{E}(t) + \hat{A}(t) + \hat{I}(t) + \hat{I}_{tp}(t) + \hat{Q}(t) + \hat{R}(t) = N$  at any time. The non-normalized quantities evolve based to following equations,

$$\dot{\hat{S}}(t) = -\hat{\beta}P^2(t)\hat{S}(t)\left[\hat{I}(t) + \hat{I}_{tp}(t) + \mu\hat{A}(t)\right] \quad (30a)$$

$$\dot{\hat{E}}(t) = \hat{\beta}P^2(t)\hat{S}(t)\left[\hat{I}(t) + \hat{I}_{sq}(t) + \hat{I}_{tp}(t) + \mu\hat{A}(t)\right] - \lambda\hat{E}(t) \quad (30b)$$

$$\dot{\hat{A}}(t) = \lambda(1 - \sigma)\hat{E}(t) - \gamma_A\hat{A}(t) \quad (30c)$$

$$\dot{\hat{I}}_{tp}(t) = p_{test}\lambda\sigma\hat{E}(t) - [\gamma_I + \gamma_{tp}]\hat{I}_{tp}(t) \quad (30d)$$

$$\dot{\hat{I}}(t) = (1 - p_{sq} - p_{test})\lambda\sigma\hat{E}(t) - \gamma_I\hat{I}(t) \quad (30e)$$

$$\dot{\hat{Q}}(t) = \gamma_{tp}\hat{I}_{tp}(t) + p_{sq}\lambda\sigma\hat{E}(t) - \gamma_I\hat{Q}(t) \quad (30f)$$

$$\dot{\hat{R}}(t) = \gamma_A\hat{A}(t) + \gamma_I\left[\hat{I}(t) + \hat{I}_{tp}(t) + \hat{Q}(t)\right]. \quad (30g)$$

where  $\hat{\beta} = N^{-1}\beta$ . All other parameters are the same as defined in Eq. 2 of the main manuscript.

## Supplementary Note 10: Model incorporating limited testing

An extended version of the model that incorporates limited testing is the following.

$$\dot{S}(t) = -\beta P^2(t)S(t)[I(t) + I_{tp}(t) + \mu A(t)] \quad (31a)$$

$$\dot{E}(t) = \beta P^2(t)S(t)[I(t) + I_{tp}(t) + \mu A(t)] - \lambda E(t) \quad (31b)$$

$$\dot{A}(t) = \lambda(1 - \sigma)E(t) - \gamma_A A(t) \quad (31c)$$

$$\dot{I}_{sq}(t) = p_{sq}\lambda\sigma E(t) - [\gamma_I + \gamma_{sq}]I_{sq}(t) \quad (31d)$$

$$\dot{I}_{tp}(t) = T \frac{p_{test}\sigma\lambda E}{p_{test}\sigma\lambda E + D} \wedge p_{test}\sigma\lambda E - (\gamma_I + \gamma_{tp})I_{tp}(t) \quad (31e)$$

$$\dot{I}(t) = (1 - p_{sq})\lambda\sigma E(t) - T \frac{p_{test}\sigma\lambda E}{p_{test}\sigma\lambda E + D} \wedge \sigma p_{test}\lambda E - \gamma_I I(t) \quad (31f)$$

$$\dot{Q}(t) = \gamma_{tp}I_{tp}(t) + p_{sq}\lambda\sigma E - \gamma_I Q(t) \quad (31g)$$

$$\dot{R}(t) = \gamma_A A(t) + \gamma_I [I(t) + I_{tp}(t) + Q(t)]. \quad (31h)$$

The flux of population that will be tested is  $p_{test}\sigma\lambda E$ , and the positive detection probability is

$$\frac{p_{test}\sigma\lambda E}{p_{test}\sigma\lambda E + D}. \quad (32)$$

This is to assume that the number of testing kits is less than the total people needed to be tested (scarcity) which can be described as: number of people which require testing  $\approx (p_{test}\sigma\lambda E + D)\Delta t$  in a small  $\Delta t \ll 1$  time. Otherwise, we will assume a probability of 1 of detecting all those with COVID-19 while ignoring the false negatives. The variable  $T$  is the flux of testing kits which are generated (so unit is number per day). We use the standard notation  $a \wedge b = \min\{a, b\}$ . The testing flux  $T$  is most-likely lower than  $p_{test}\lambda E$ , but if we take a temporally averaged value of  $T$ , it is likely that we can get everyone a kit at the early stage. The above general model considers the possibility that testing kits are scarce (i.e.,  $T < (p_{test}\sigma\lambda E + D)$ ). However, for NY, at this moment (subdued pandemic), it is likely that the resource is not scarce.

From Yen-Ting's email below.

Here is what I found in the review: two significant mis-formulations.

- *Incorrect formulation of the probability.* The term  $I/(I + D)$  is supposed to be a probability, but in an early estimation, we used the estimated **daily visits** of the flu patients as a surrogate  $D$ , but we use the instantaneous  $I$ . Fundamentally, it means that all the infected are flooding into the system and get tested, and again, back to the point above: once a patient is tested negative, it is unlikely that s/he would come back to the system due to the scarce resource. Recall that there had been a significant amount of time that New Mexico only allowed one testing per household, for example.
- *Confusion of the probability and rate constants.* In order to reduce the dimensionality, we try to scramble too many things in the  $I$  compartment, leading to a possibly wrong representation. The quantity  $I/(I + D)$  is supposed to be some probability of successful detection, but it is multiplied in the rate constant. This would correspond to a continuously testing scheme: a person is infected, goes to be tested, and if negative, s/he gets tested over and over again until s/he either recovers or is confirmed positive. This is not what's going on in most countries: we only test it once.
- *Underestimation of the infected population.* This is because in reality, not all the infected population would go and be tested: many just sit them out, possibly with self-quarantine.

The reason for considering a *flux* of people getting tested for the purpose of defining an estimation of the probability of detection is to reflect the current climate of COVID-19 testing in the U.S. which does not involve repeat testing after a negative result(one-shot testing). The COVID-19 testing climate also includes the current scarcity of test kits. The flux of people becoming sick with COVID-19 is defined as  $\propto \lambda\sigma E$ .



## References

- [1] Victor M Becerra. Solving complex optimal control problems at no cost with psopt. In *2010 IEEE International Symposium on Computer-Aided Control System Design*, pages 1391–1396. IEEE, 2010.
- [2] Jorge Nocedal and Stephen Wright. *Numerical optimization*. Springer Science & Business Media, 2006.
- [3] Anil V Rao. A survey of numerical methods for optimal control. *Advances in the Astronautical Sciences*, 135(1):497–528, 2009.
- [4] I Michael Ross. *A primer on Pontryagin’s principle in optimal control*. Collegiate publishers, 2015.
- [5] I Michael Ross and Mark Karpenko. A review of pseudospectral optimal control: From theory to flight. *Annual Reviews in Control*, 36(2):182–197, 2012.
- [6] Andreas Wächter and Lorenz T Biegler. On the implementation of an interior-point filter line-search algorithm for large-scale nonlinear programming. *Mathematical programming*, 106(1):25–57, 2006.
